# 1 **Movement-related activity dominates cortex during sensory-guided** 2 **decision making**

3 Simon Musall\*, Matthew T. Kaufman\*, Steven Gluf, Anne K. Churchland  
4

## 5 **Abstract**

6 An animal's movements and internal state generate an "internal backdrop" of activity that is dynamically  
7 modulated. During behavior, this internal backdrop interacts with signals arising from incoming sensory  
8 stimuli and may have a substantial impact on task-related computations, like those underlying decision-  
9 making. To understand the joint effects of internal backdrop and task-imposed variables, we measured  
10 neural activity across the entire dorsal cortex of task-performing mice. We characterized internal backdrop  
11 using multiple measures of self-generated parameters including pupil diameter, whisking and body motion.  
12 Surprisingly, internal backdrop dominated neural activity across the entire cortex, dwarfing task-related  
13 variables and even sensory stimuli. Single neurons in frontal cortex were likewise dominated by internal  
14 backdrop. A linear model allowed us to account for multiple dimensions of internal backdrop and uncover  
15 hidden signatures of task-related activity. We show that complex, ongoing behavior fundamentally shapes  
16 neural activity throughout cortex and must be accounted for when studying decision-making.

## 17 **Highlights**

- 18 1. We imaged cortex-wide neural activity during auditory and visual decisions in mice.
  - 19 2. Cortical activity was surprisingly similar during sensory-guided versus random decisions.
  - 20 3. Movement and state variables vastly outperformed task variables in predicting neural activity.
  - 21 4. A linear model revealed hidden task-related activity in brain areas and single neurons.
- 22  
23

## 1 Introduction

2 Complex behaviors are accompanied by dynamic responses across cortical circuits. During decision-  
3 making, cortical activity reflects multiple processes including sensory inputs (Freedman and Assad, 2006;  
4 Meister et al., 2013), selection and integration of behaviorally-relevant information (Roitman and Shadlen,  
5 2002), estimation and anticipation of reward (Bouret and Sara, 2004; Pratt and Mizumori, 2001), choice  
6 confidence (Kepecs et al., 2008) and recent trial history (Abrahamyan et al., 2016; Bichot and Schall, 1999;  
7 Manoach et al., 2007; Morcos and Harvey, 2016).

8 Many decision-making studies have acknowledged the potential impact of decision-related movements on  
9 neural activity. Because neural activity in many decision-making structures is known to reflect movements,  
10 it is essential to separate the impact of movements from that of decision formation. Movements that are  
11 associated with decision reporting, such as head orientation (Erlich et al., 2011), eye movements (Roitman  
12 and Shadlen, 2002) or licking (Allen et al., 2017) are therefore often taken into account to ensure that the  
13 variable of concern cannot fully explain decision-related activity.

14 Beyond decision-reporting, other movements are known to strongly modulate neural activity. For instance,  
15 active whisking, and not passive touch alone, is critical for texture discrimination and object localization in  
16 mice (Chen et al., 2013; O'Connor et al., 2013). Running modulates the gain of visual inputs (Mineault et  
17 al., 2016; Niell and Stryker, 2010; Polack et al., 2013) and is critical for integration of visual motion (Ayaz  
18 et al., 2013; Saleem et al., 2013) and predictive coding (Keller et al., 2012). These movements are also  
19 known to modulate neural activity in other cortical areas (Ferezou et al., 2007; Shimaoka et al., 2018). A  
20 potential explanation for these widespread effects is that certain movements reflect changes in the animal's  
21 internal state, like increased arousal during running (Niell and Stryker, 2010). Indeed, internal state can  
22 account for changes in neural activity of different sensory areas that are as strong as responses to sensory  
23 stimuli (Crochet and Petersen, 2006; Okun et al., 2015; Pachitariu et al., 2015). Internal state is also  
24 reflected in pupil dilation, which is associated with increased excitability and desynchronization of cortical  
25 neurons (Reimer et al., 2014). Importantly, movements and pupil dilation have distinct effects on cortical  
26 activity (Vinck et al., 2015), suggesting that internal state is multidimensional and driven by a variety of  
27 internal sources (Harris and Thiele, 2011). The combined effects of movements and internal state  
28 transitions can therefore be thought of as an 'internal backdrop' that may be important to consider when  
29 analyzing neural responses.

30 Broad measures of the internal backdrop are rarely incorporated into analyses of decision-making activity.  
31 This is in part because most studies of cortical modulation due to internal state have been focused on  
32 sensory areas (Niell and Stryker, 2010; Okun et al., 2015; Pachitariu et al., 2015; Polack et al., 2013; Reimer  
33 et al., 2014; Vinck et al., 2015). The impact of internal backdrop on decision-making areas is therefore  
34 poorly understood. Since most studies also use only narrow measures of internal state, like pupil dilation  
35 or running speed, the combined importance of multiple movements on neural activity is also unclear.  
36 Broadening this scope has been challenging because it requires measuring many different movements  
37 together with cortex-wide neural activity in task-performing animals.

38 To assess the impact of internal backdrop on decision-making, we used widefield imaging to measure  
39 neural activity across the entire dorsal cortex of mice performing auditory or visual decisions, while tracking  
40 a wide array of movements and pupil diameter. To evaluate how cortical activity was affected by task-  
41 related or self-generated variables, we built a linear encoding model. Surprisingly, animal movements  
42 captured the majority of signal variability across the cortex, outpacing other variables such as sensory  
43 stimuli, choice and reward. Moreover, task-aligned movements had a significant impact on trial-averaged  
44 data and accounted for features commonly attributed to cognitive task demands, like evidence  
45 accumulation, urgency, or motor planning. Similar results were found for individual neurons measured with  
46 two-photon (2p) imaging. These observations argue that the internal backdrop has a much larger  
47 impact on neural activity during decision-making than previously appreciated.

## 1 Results

### 2 Cortex-wide imaging during auditory and visual decision making

3 To measure cortex-wide neural dynamics during perceptual decisions, we trained mice to report the spatial  
4 position of an auditory or visual stimulus. Animals interacted with handles to initiate trials and lick spouts to  
5 report choices. Handles and spouts were controlled by servo motors to limit their accessibility to appropriate  
6 epochs in the task (Batista-Brito et al., 2017; Goard et al., 2016) (Fig. 1A-B).

7 Stimuli were presented 0.875-1.125 s after handle touch and consisted of auditory or visual stimulus  
8 sequences. Each sequence consisted of two 0.6-s long presentations, separated by a 0.5 s gap. After a 1 s  
9 delay, animals could report a decision and receive a water reward when licking the spout that corresponded  
10 to the stimulus presentation side (Fig. 1B). Two distinct cohorts of animals were trained on either auditory  
11 or visual stimuli (but not both) and consequently achieved expert performance in the trained modality (Fig.  
12 1C). Expert mice generalized the task timing, but not contingencies, to the untrained modality. This enabled  
13 us to measure cortical activity during either sensory-guided decisions or random guesses in the same  
14 animals (e.g., vision experts in blue were ~80% correct in visual trials but remained at novice level in  
15 auditory trials).

16 To study neural activity during decision making, we used a custom-built widefield microscope (Ratzlaff and  
17 Grinvald, 1991) with a large 12.5 x 10.5 mm field of view (Fig. 1D). Mice were transgenic (Ai93; Emx-Cre;  
18 LSL-tTA; CaMKII-tTA), expressing the Ca<sup>2+</sup>-indicator GCaMP6f in excitatory neurons. Fluorescence was  
19 measured through the cleared, intact skull (Guo et al., 2014). To avoid contamination from intrinsic signals  
20 (e.g., hemodynamic responses), we used excitation light at 473 nm to record Ca<sup>2+</sup>-dependent fluorescence  
21 and excitation light at 405 nm to record Ca<sup>2+</sup>-independent fluorescence (Lerner et al., 2015) on alternating  
22 frames. By rescaling and subtracting Ca<sup>2+</sup>-independent fluorescence we were then able to isolate a purely  
23 Ca<sup>2+</sup>-dependent signal (Allen et al., 2017; Weksselblatt et al., 2016). Using a combination of four brain  
24 landmarks, we aligned all data to the Allen Institute Common Coordinate Framework v3 (CCF, Fig. S1). To  
25 confirm accurate CCF alignment, we performed retinotopic visual mapping (Marshel et al., 2011) in each  
26 animal and found high correspondence between functionally identified visual areas and the CCF (Fig. 1E,  
27 Fig. S2).

28 Baseline-corrected fluorescence ( $\Delta F/F$ ) revealed significant modulation of neural activity across dorsal  
29 cortex during different episodes of the task (Fig. 1F, Video S1; average response to visual trials, 22 sessions  
30 from 11 mice). While holding the handles, cortical activity was strongest in the somato-motor areas for hind-  
31 and forepaw ('Hold'). The first visual stimulus caused robust activation of visual areas in posterior cortex  
32 and weaker responses in secondary motor cortex (M2) ('Stim 1'). Activity in anterior cortex increased during  
33 stimulus presentation ('Stim 2') and the delay period ('Delay'). When animals were allowed to respond,  
34 neural activity strongly increased throughout dorsal cortex ('Response'). A comparison of neural activity  
35 across conditions confirmed that neural activity was modulated by whether the stimulus was auditory vs.  
36 visual (Fig. 1G) and whether it was presented on the left vs. right (Fig. 1H). In both cases, differences across  
37 conditions were mainly restricted to primary and secondary visual areas. Activity in more anterior structures  
38 was nearly identical across conditions. This similarity may be because areas for motor planning are less  
39 lateralized (Li et al., 2015) and exhibit mixed tuning for both decision sides and modalities. Surprisingly, a  
40 comparison of neural activity in novice vs. expert decisions revealed almost no difference between the two  
41 trial categories (Fig. 1I). This similarity across the entire dorsal cortex was evident despite markedly different  
42 behavioral performance (Fig. 1C), suggesting that large parts of cortical activity did not distinguish informed  
43 decisions vs. guesses.

44

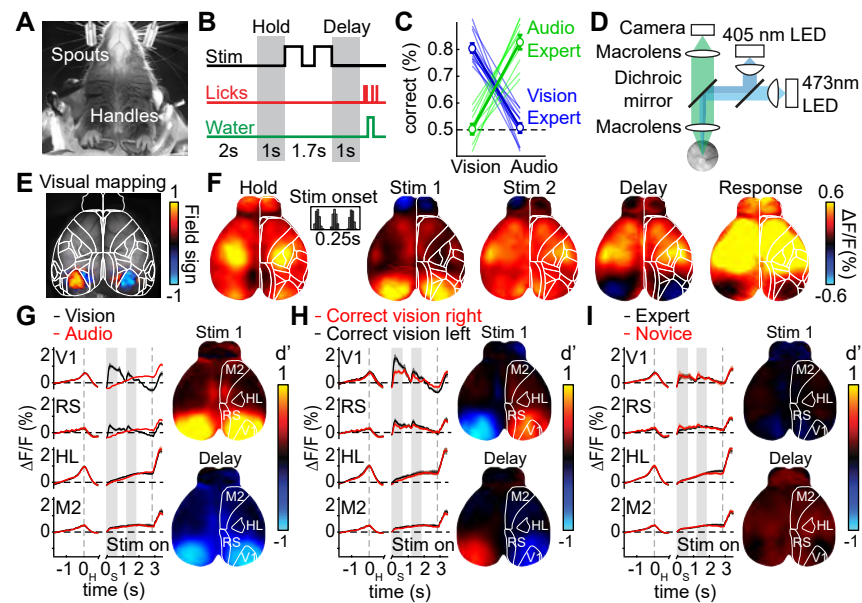

**Figure 1. Widefield calcium imaging during auditory and visual decision making.**

(A) Bottom view of a mouse in the behavioral setup. (B) Single-trial timing of behavior. Mice held the handles for ~1 s to trigger the stimulus sequence. After a 1 s delay, water spouts moved in so mice could report a choice. (C) Expert vs. novice behavior. Visual experts (blue) had high performance with visual but novice performance with auditory stimuli. Auditory experts (green) showed the opposite. Thin lines show individual animals, thick show averages. Error bars represent mean  $\pm$  s.e.m. (D) Schematic of widefield macroscope. Alternating blue and violet excitation light was projected on the brain surface. Green emission light was captured by an sCMOS camera through two macro lenses. (E) Example visual sign map, aligned to Allen CCF. Mapped areas largely agreed with corresponding locations of visual areas in the CCF (white lines). (F) Cortical activity during different task episodes averaged over 11 mice. Shown are responses when holding the handles ('Hold'), visual stimulus presentation ('Stim 1&2'), the subsequent delay ('Delay') and the response period ('Response'). In each trial, stimulus onset was pseudo-randomized within a 0.25 s long time window (inset). (G) Left: Traces show average responses in V1, retrosplenial cortex (RS), hindlimb somatosensory cortex (HL) and secondary motor cortex (M2) on the right hemisphere during visual (black) or auditory (red) stimulation. Trial averages are double-aligned to the time of trial initiation (left dashed line) and stimulus onset (gray bars). Right dashed line indicates response period, shading indicates s.e.m. Right:  $d'$  between visual and auditory trials during first visual stimulus (top) and the subsequent delay period (bottom). (H) Same as (G) but for correct visual trials on the left versus right side. (I) Same as (G) but for expert versus novice modality.

## 1 **Movements dominate cortical activity**

2 To better understand how behavior related to neural activity, we built a linear model. The model was  
3 designed to account for the fluorescence of each pixel via any time-varying combination of 23 possible  
4 behavioral variables, while at the same time preventing overfitting of the dataset (see Methods). The  
5 predictor matrix (i.e., the design matrix) was constructed from sets of regressors, where each set was  
6 locked to a different sensory or motor event (Fig 2A, Steps 1-2). The regressors in each set formed a  
7 temporal sequence of pulses to allow the linear reconstruction of neural activity over time, relative to event  
8 onset. For sensory events, each regressor set contained regressors locked to each frame from stimulus  
9 onset until the end of the trial ('Post-event', blue). For motor events, regressors spanned a fixed duration  
10 of 0.5 s before until 1 s after event onset ('Peri-event', green). To account for cognitive task variables with  
11 no defined event onset, such as animal success in a given trial, we used regressor sets that spanned the  
12 entire trial ('Whole trial', black). We also included non-binary regressors, such as data from a piezo sensor  
13 underneath the animal to track hindpaw movements ('Analog', orange). Each behavioral variable was thus  
14 represented by a set of specific regressors. The model was fit to the data using ridge regression. Each  
15 regressor was assigned a  $\beta$ -weight, indicating how strongly that single regressor was linearly related to the  
16 neural activity in a given pixel (Fig. 2A, Step 3). To reduce computational cost, we used singular value  
17 decomposition (SVD) on the imaging data and predicted changes in data dimensions instead of individual  
18 pixels. Multiplying the full design matrix with the corresponding  $\beta$ -weights results in a model reconstruction  
19 of the imaging data (Fig. 2A, Step 4).

20 In addition to traditional behavioral measurements (such as lick times), we leveraged video data from two  
21 cameras, observing the animal's face and body. These data were used in two ways: first, we used video  
22 data to estimate variables known to modulate neural activity, such as whisking and pupil size (Fig. 2B).  
23 Second, we used SVD to extract the 200 highest-variance video dimensions and used them as analog  
24 regressors to provide additional information on animal movements that we could not track otherwise or had  
25 not previously considered (Powell et al., 2015; Stringer et al., 2018). To capture video motion energy, we  
26 additionally included the top 200 SVD dimensions from the absolute, temporal derivative of the video data.  
27 To ensure that video regressors did not overlap with other model regressors, we used a QR decomposition  
28 to orthogonalize these video regressors from the other model variables.

29 Cortical maps of  $\beta$ -weights confirmed expected features of the data, matching known roles of visual and  
30 motor cortices. For example, pixel weights located in left V1 were highly positive in response to a rightward  
31 visual stimulus (Fig. 2C, left); pixels located in left somatosensory and primary motor forelimb area were  
32 highly positive when the right handle was grabbed (Fig. 2C, right). To evaluate how well the model captured  
33 neural activity at different cortical locations, we computed the 10-fold cross-validated  $R^2$  for the full model  
34 at different epochs during the trial (Fig. 2D). While some areas were particularly well predicted in specific  
35 trial epochs (e.g., V1 during stimulus presentation), there was high predictive power throughout the cortex  
36 during all epochs of the trial. For all data ('Whole trial'), the model predicted  $37.8 \pm 1.2\%$  of all variance  
37 across cortex.

38 We next sought to address which particular model variables were most critical for its success. The simplest  
39 way to do this is to fit a model consisting of a single variable, and ask how well it predicts the data. We  
40 therefore computed cross-validated  $R^2$  values, over all data, for each single-variable model separately. As  
41 shown in the light green bars in Fig. 2E, many variables could individually predict a large amount of variance  
42 in the imaging data. However, model variables that were associated with animal movement or internal state  
43 ('Movement') contained particularly high predictive power compared to task-related variables ('Task'). This  
44 suggests that these movement and state variables, which reflect the internal backdrop, are particularly  
45 important for predicting cortical activity. Interestingly, video ('Video') and motion energy ('Video ME') were  
46 the most predictive model variables, each explaining  $\sim 25\%$  of all variance. By projecting  $\beta$ -weights of the  
47 video-dimension regressors back into video pixel space, we found that specific areas in the animal's face,  
48 especially the jaw, were particularly important for predicting multiple dimensions of cortical activity (Fig. S3).

49

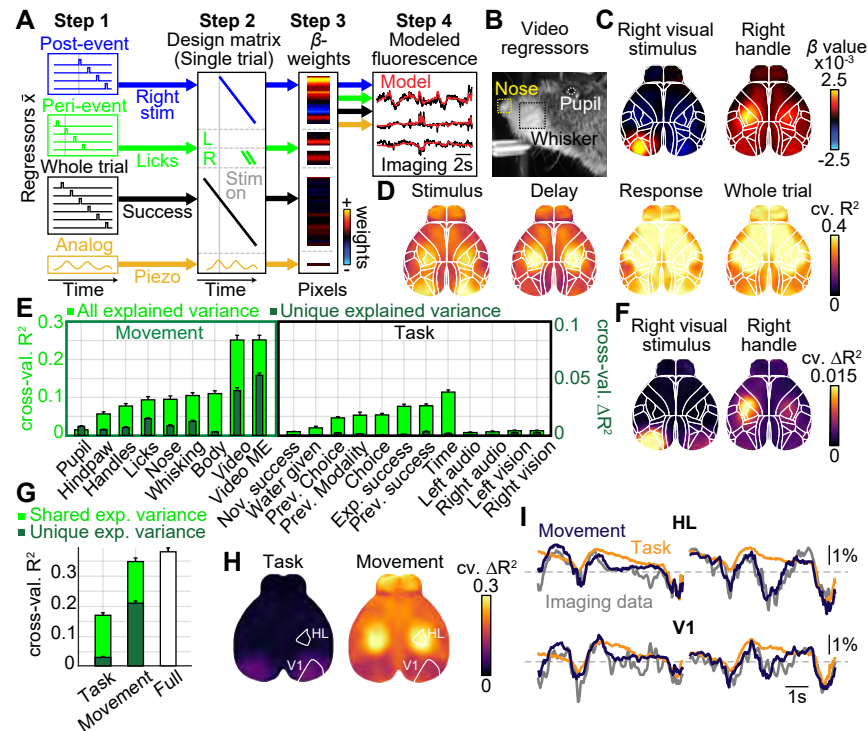

**Figure 2. A linear model to reveal behavioral correlates of cortical activity.**

(A) Schematic of the linear model. Behavioral variables were encoded with regressor sets (Step 1) that were combined into a design matrix (Step 2). A single-trial example shows regressors for a rightward stimulus, animal licks, animal success and hindpaw movement. Each regressor is assigned a  $\beta$ -weight via ridge regression, describing its impact on each pixel (Step 3). Multiplying regressors with their respective weights allows reconstruction of the imaging data (Step 4). (B) Example image of facial video camera. Video data was used to extract pupil diameter, whisker and nose motion. A reduced-dimensionality version was also included as a model variable. (C) Maps of  $\beta$ -weights for right visual stimulus or grabbing the right handle, 100 ms after event onset. (D) Maps of cross-validated explained variance for different episodes of the task. (E) Explained variance for individual model variables. Shown is either all explained variance (light green) or unique explained variance (dark green). Values averaged across cortex, bars represent mean  $\pm$  s.e.m over 22 sessions. Y-axis scale differs for all vs. unique variance. Nov.: novice; Exp.: expert; Prev.: previous. (F) Maps of unique explained variance for right visual stimulus or grabbing the right handle. (G) Explained variance for groups of model variables. Conventions as in (E), white bar indicates explained variance of the full model. Exp.: explained. (H) Maps of unique explained variance for groups of model variables. Area outlines indicate V1 and HL. (I) Example traces from two visual trials in areas V1 (bottom) and HL (top). Gray traces indicate recorded imaging data, purple and orange traces indicate predictions from a movement-only or task-only model, respectively. The movement model predicted single trial dynamics more accurately than the task model.

1 While many model variables contained high predictive power, it is critical to quantify the amount of unique,  
2 non-redundant information contained in each variable. For instance, while licking had high predictive power,  
3 it could also be strongly correlated to other task variables such as choice, since licking occurs at roughly  
4 the same time in each trial. It might therefore contain little unique information that is not present in other  
5 model variables. In this example, removing lick regressors from the model should not affect the model's  
6 overall predictive power since other variables could predict the cortical data equally well.

7 To isolate the predictive power that is unique to each variable, we created reduced models in which we  
8 temporally shuffled the regressor set of a given variable, and compared these reduced models to the full  
9 model. The resulting loss of predictive power ( $\Delta R^2$ ) with shuffling provides a conservative estimate of the  
10 amount of unique information contained in that variable. Pixel-wise  $\Delta R^2$  maps showed that unique  
11 information was highly spatially localized (Fig. 2F, see Fig. S4 for other model variables) and matched the  
12 cortical areas where  $\beta$ -weights were highest (Fig. 2C and 2F are highly similar).

13 This analysis revealed considerable variability in how essential each variable was to the model (Fig. 2E,  
14 dark green bars). A good example is the 'time' variable, a regressor set designed to capture signal  
15 deviations that always occur at the same time in each trial (similar to an average over all trials). Although  
16 the time-only model captured considerable variance (light green bar), eliminating this variable had a  
17 negligible effect on the model's predictive power (dark green bar). This is because other task variables,  
18 such as choice or stimulus regressors, could capture time-varying modulation equally well. In contrast,  
19 movement variables contained large amounts of unique information. Notably, the video-based regressors  
20 contained a high degree of both overall and unique information, substantially outperforming all task-related  
21 model variables (Fig. 2E, both dark and light green bars corresponding to 'Video' and 'Video ME' are large).

22 To directly compare the impact of movement and internal state vs. task variables, we assigned each  
23 variable into either a 'movement' or 'task' category (Fig. 2G). The resulting movement model contained a  
24 very high amount of unique information, more than 5-fold as much as the task model ( $\Delta R^2_{\text{Motor}} = 19.54 \pm$   
25  $0.8\%$  vs.  $\Delta R^2_{\text{Task}} = 3.43 \pm 0.2\%$ ; dark green bars). This stark difference was even more pronounced in  
26 cortical maps of unique explained variance. These maps revealed that the movement model was far more  
27 predictive than the task model throughout the entire cortex (Fig. 2H, Video S2). The same result was also  
28 clearly visible when comparing the accuracy of single-trial reconstructions in different cortical areas,  
29 including V1 (Fig. 2I). These results strongly argue that cortical activity is much better explained by the  
30 internal backdrop than by cognitive or sensory task variables.

### 31 **Accounting for internal backdrop benefits the interpretation of trial-averaged data**

32 Importantly, the large fraction of variance that is uniquely explained by the movement model is, by definition,  
33 orthogonal to the temporal structure of the task. This activity therefore cannot be captured when averaging  
34 over trials. However, there was also a significant amount of explained variance that was shared between  
35 the movement and task model ( $R^2_{\text{Shared}} = 14.86 \pm 0.9\%$ ; Fig. 2G, light green bars same for task and  
36 movement), indicating that many features that are visible in a trial average may be either due to task  
37 variables or to certain movements that are task-aligned (e.g., licking at a specific time in every trial). To  
38 assess which movement variables were task-aligned, for each movement variable we computed how much  
39 explained variance influenced the trial average ('task shared' variance) and how much was trial-by-trial  
40 variability that averaged out across trials ('task independent' variance). Surprisingly, almost all movement  
41 regressors contained a large amount of explanatory power that was shared with task variables (Fig. 3A,  
42 light blue bars), indicating that each may have a considerable impact on the trial average.

43

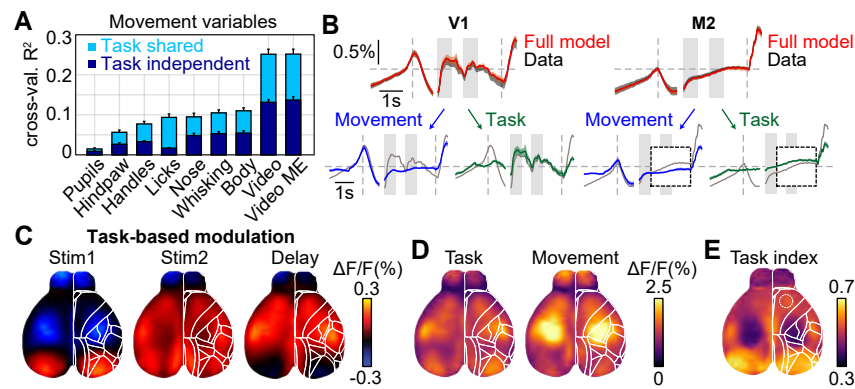

**Figure 3. Accounting for internal backdrop benefits the interpretation of trial-averaged data.** (A) Explained variance for individual movement variables. Shown is either unique, task-independent (dark blue) or task-shared explained variance (light blue). Values averaged across cortex, bars represent mean  $\pm$  s.e.m over 22 sessions. (B) Trial-averaged data for areas V1 and M2. Top row shows averaged imaging (black traces) and modeled (red traces) data over all trials. Bottom row shows average reconstructions based on either movement or task variables alone, using weights from the full model. Dashed boxes show post-stimulus period in M2 that is jointly modulated by movement and task variables. Trial-averages are aligned to the time of trial initiation (dashed line) as well as stimulus onset (gray bars). Right dashed line indicates response period, shading indicates s.e.m. (C) Cortical maps of task-based reconstructions as shown in green in (B). Shown are average modulation during the first and second stimulus and the delay period. (D) Absolute modulation of trial averages for either the task or movement model. (E) Cortical map of the task modulation index. Dashed circle indicates location of ALM.



1 To better understand how movement and task variables influenced the trial average, we used the full model  
2 to reconstruct the imaging data and computed trial averages for different cortical areas (Fig. 3B, top). As  
3 expected, the model closely reconstructed the imaging data. We then split the model prediction into two  
4 parts, based on movement and task variables, without re-fitting. This provides the best available estimate  
5 of the relative contribution of all movement (blue traces) and task variables (green traces) on the trial  
6 average. In V1 (left), baseline activity was mainly reconstructed with movement variables whereas activity  
7 after visual stimulation was well explained by task variables. In M2 (right), baseline activity was also mostly  
8 explained by movement whereas later activity was explained by a combination of both task and movement.  
9 Separating trial averages into task and movement components therefore allowed us to assess which  
10 features of trial-averaged activity are likely to be truly task-related when taking animal movements and state  
11 into account.

12 When we reconstructed trial-averaged activity across cortex based on task variables alone, we found  
13 several areas that were substantially task-modulated. Shortly after stimulus onset, task modulation was  
14 highest in the visual areas (Fig. 3C, 'Stim1'). During subsequent visual stimulation and the delay ('Stim2' &  
15 'Delay'), additional modulation developed along the midline, especially in retrosplenial cortex but also parts  
16 of M2 and facial somatosensory cortex. To summarize these effects, we summed absolute task modulation  
17 over the whole trial duration (Fig. 3D left). We then computed a task modulation index (TI) to identify areas  
18 that were most strongly affected by task vs. movement variables (Fig. 3E). The TI was defined as the  
19 difference between absolute task and movement modulation (Fig. 3D, left minus right) divided by their sum,  
20 rescaled between 0 and 1. High TI values indicate stronger trial-average modulation due to task variables,  
21 while low values indicate a strong movement contribution. The TI revealed multiple cortical areas with  
22 considerable relative task modulation. These areas are potential candidates for involvement in decision-  
23 making, and included primary and secondary visual cortex, facial somatosensory cortex and specific sub-  
24 areas within medial and anterior M2.

## 25 **Accounting for internal backdrop benefits the interpretation of single-neuron data**

26 One of these identified areas was the anterior lateral motor cortex (ALM; circled in Fig. 3E). This area was  
27 of particular interest because recent work has identified ALM as causally involved in comparable decision-  
28 making tasks (Chen et al., 2017; Li et al., 2015). We therefore used 2p imaging to investigate ALM more  
29 closely and determine whether activity of individual ALM neurons is strongly task-modulated. This was also  
30 particularly important because widefield imaging mainly reflects average activity across many neural  
31 structures in superficial layers (Allen et al., 2017). It was therefore not clear whether the importance of  
32 animal movement and state would be equally strong on a single-cell level.

33 In agreement with earlier reports (Li et al., 2015), many individual ALM neurons were highly active during  
34 licks to the contralateral spout ( $d^1_{\text{Lick-Baseline}} > 1$  for 21% of all neurons, Fig. 4A, top). Other neurons exhibited  
35 modulation that was aligned to other task events, such as grabbing the handles, or showed mixed tuning  
36 (middle). Some neurons exhibited no modulation in their trial averages ('untuned', bottom).

37 We then applied the exact same linear model as above to the single-cell 2p data. In the single-cell data, as  
38 in the widefield data, individual movement variables strongly outperformed task variables (Fig. 4B, light  
39 green bars). Given the known causal role of ALM for licking (Li et al., 2015), one might expect that licking  
40 would be a particularly important variable to predict ALM activity. Instead, in agreement with our widefield  
41 results, we found that almost all movement variables contained considerable information and video-based  
42 regressors were far more powerful than any other model variable.

43 Many movement variables also contained a large amount of unique information ( $\Delta R^2$ , dark green bars). In  
44 contrast, task variables explained much less of the overall variance across neurons and contained very  
45 little unique explanatory power. Again, this strong difference between movement and task variables became  
46 clearer still when comparing the variables by group (Fig. 4C). The full model's predicted variance was  
47 almost entirely matched by the movement model ( $R^2_{\text{Full}} = 28.85 \pm 0.7\%$ ;  $R^2_{\text{Motor}} = 28.13 \pm 0.7\%$ ; both light +  
48 dark green bars), whereas the task model accounted for much less variance and contained very little unique

1 information ( $R^2_{\text{Task}} = 8.74 \pm 0.6\%$ , both bars;  $\Delta R^2_{\text{Task}} = 0.7 \pm 0.003\%$ , dark green bar). These effects were  
2 not driven by outliers but found in almost every recorded neuron. Across all neurons, a movement-only  
3 model performed almost identically to the full model in predicting single-cell variance (Fig. 4D, top: light  
4 blue trace overlies red trace). For all cells, a large portion of variance was also uniquely explained by the  
5 movement model (top, dark blue trace). Conversely, the task model predicted less variance in most neurons  
6 (bottom, light green trace) and accounted for any substantial variance at all in only about half of all cells.

7 Very few cells contained variance that was uniquely explained by the task model (bottom, dark green  
8 trace). These results demonstrate that the internal backdrop is of key importance for predicting activity of  
9 individual neurons, just as for widefield population data. Moreover, many neurons that would usually be  
10 considered untuned due to their lack of modulation by task variables (Fig 4D, bottom: light green line is  
11 close to 0 for ~50% of neurons) could still be explained and rendered interpretable by movement  
12 variables.

13 The dominance of the backdrop in single cell activity is also worrying, as it implies that many neural  
14 response features that appear to be task-related might in fact be due to movements or state transitions that  
15 are temporally aligned with the task. It is important to note that this concern is limited to variance that is  
16 shared between movement and task variables (light green bars). The majority of movement-explained  
17 variance is unique to the movement model, and therefore orthogonal to the task. That is, the majority of the  
18 internal backdrop accounts for 'spontaneous' trial-by-trial variability that is removed when averaging over  
19 trials.

20 To determine whether features in the trial average were best explained by task or movement variables, we  
21 repeated the analysis from Fig. 3 and reconstructed trial-averaged data for each neuron based on the full  
22 model. We then computed the absolute sum of all deviations in the trial average that were either due to  
23 movement or task variables. As shown in Fig. 4E, the trial average of many neurons was still appreciably  
24 modulated by task variables. Using the TI described above, we could then isolate neurons that were  
25 strongly modulated by either movement or task variables. For neurons with a low TI, the trial average was  
26 almost exclusively modulated by movement variables, including average features that could easily be  
27 confused with stimulus-evoked responses or evidence integration signals (Fig. 4F, blue box). Conversely,  
28 neurons with a high TI were strongly modulated by task variables, thus identifying individual neurons whose  
29 trial average was strongly affected by the behavioral task instead of animal movement or state (green box).

30 Importantly, this distinction would not have been visible by examination of the trial average alone. The  
31 movement-driven example cell exhibited many average features that might have appeared to be responses  
32 to the stimuli, and a late rise in firing is reminiscent of decision formation. The model argues that these  
33 explanations are inaccurate. On the other hand, in the task-driven example cell, the rising activity might  
34 have appeared closely linked to licking, but was found to be mainly driven by task variables. Our model-  
35 driven approach therefore provided much more detailed insight into each neuron's tuning preference and  
36 enabled us to isolate single neurons that were truly task-modulated when taking internal backdrop into  
37 account.

38

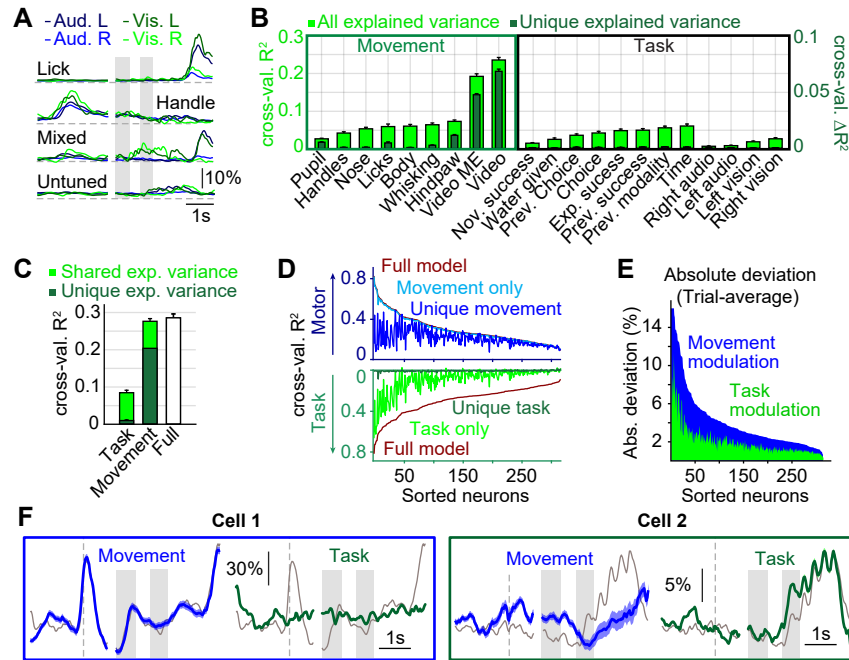

**Figure 4. Accounting for internal backdrop benefits the interpretation of single-neuron data.**

**(A)** Trial-averaged activity for example neurons. Colors indicate responses to left/right auditory stimuli (blue) and left/right visual stimuli (green). **(B)** Explained variance for individual model variables. Shown is either all explained variance (light green) or unique explained variance (dark green). Values are averaged across all neurons, mean  $\pm$  s.e.m over 315 cells. Y-axis scale differs for all vs. unique variance. Nov.: novice; Exp.: expert; Prev.: previous. **(C)** Explained variance for groups of model variables. Conventions as in (B), white bar indicates all explained variance of the full model. Exp.: explained. **(D)** Explained variance of individual neurons, sorted by full-model performance (red traces). Light blue trace shows explained variance of a movement-only model, dark blue shows the unique explained variance by movement (same as light/dark green bars in C). Light/dark green traces show full/unique explained variance by the task model. **(E)** Absolute modulation of single-cell trial averages due to task or movement variables. Green bars show average deviations due to task variables, blue bars due to movement variables. Neurons are sorted by absolute deviation of the trial average. Bar plots stacked. **(F)** Linear model reveals tuning preference of individual neurons. Blue box: single cell trial average with substantial modulation after stimulus onset (gray bars) and increasing activity before the response period, that is well-explained by movement variables. Green box: cell with strong modulation that is largely explained by task variables. Dashed lines indicate trial initiation, shading is s.e.m over trials.

## 1 Discussion

2 Our results demonstrate that activity across dorsal cortex is dominated by the internal backdrop. By  
3 including a wide array of self-generated movements and pupil dilation into our linear model, we were able  
4 to take these variables into account and predict neural activity with high accuracy. The dominance of the  
5 internal backdrop was observed in both cortex-wide population activity and single neuron data. By  
6 quantifying the modulation of trial-averaged data through movement and task variables, we could also  
7 identify cortical areas or individual neurons that were most affected by task variables and thus reveal the  
8 spatiotemporal dynamics of truly task-related activity.

### 9 Cortical activity is widely invariant to animal expertise

10 By training animals on either visual or auditory stimuli but testing them with both modalities, we could  
11 compare neural activity during sensory-guided decisions (expert) versus random guesses (novice) in the  
12 same animal. This allowed us to separate neural activity that was due to stimulus presentation or movement  
13 from informed utilization of sensory inputs. Surprisingly, though animals understood one contingency and  
14 were at chance for the other, cortical responses were highly similar for expert and novice decisions across  
15 the many activated areas in dorsal cortex. This suggests that most trial-averaged activity we observed  
16 across cortex does not reflect the transformation of sensory evidence to guide informed choices, but instead  
17 reflects responses closely related to sensory input, movements and state changes. This might also explain  
18 the discrepancy between studies that have shown widespread task-related activity in many different brain  
19 areas (Allen et al., 2017; Goard et al., 2016; Merre et al., 2017), and studies in which systematic inactivation  
20 of many cortical areas found no behavioral effects (Allen et al., 2017; Guo et al., 2014; Katz et al., 2016).

21 More subtle decision-related activity might be overshadowed by such cortex-wide modulations. But when  
22 we separated movement- from task-related activity, cortical responses for expert and novice decisions  
23 remained similar (Fig. S5). There are at least two potential reasons for this. Sensory-guided decisions may  
24 be encoded by specific sub-populations of cortical neurons that are intermixed within more diverse local  
25 networks (Li et al., 2015); or, they may exhibit extensive mixed selectivity (Park et al., 2014; Raposo et al.,  
26 2014; Rishel et al., 2013). Either scenario would obscure the impact of relevant neurons on the population  
27 average that is reflected in widefield signals. While this issue is best addressed by measuring individual  
28 neurons locally, cell-type-specific widefield imaging could also be used to measure activity of neuronal  
29 subtypes across the cortex (Allen et al., 2017; Chan et al., 2017). By measuring from layer- or projection-  
30 specific subpopulations instead of all excitatory neurons, this approach may provide a more detailed view  
31 of large-scale cortical information processing. It may also help to alleviate an important caveat of widefield  
32 imaging: its bias towards superficial layers (Allen et al., 2017), which may obscure more task-related neural  
33 activity in deeper layers. While our 2p imaging results revealed individual neurons with interesting task  
34 modulation, recordings in deeper layers might be even more informative to find decision-related activity that  
35 was not seen with widefield imaging.

36 Another explanation for the lack of cortical modulation specific to informed decisions could be the behavioral  
37 task design. Our task has several advantages, allowing for fast training (2-4 weeks), robust behavioral  
38 performance and comparison of expert vs. novice decisions. However, some cortical areas may be more  
39 important in a different setting, like during learning of a new behavior (Chen et al., 2013; Kawai et al., 2015;  
40 Merre et al., 2017), during tasks that require temporal accumulation of noisy sensory evidence (Erich et  
41 al., 2011; Licata et al., 2017) or during spatial navigation (Harvey et al., 2012; Pinto et al., 2018). If true, the  
42 methods and analyses that we describe here might be critical to detect or correctly attribute additional  
43 cortical involvement in other behavioral paradigms.

44 One of the non-sensory areas that we identified as task-modulated was ALM, which has been shown to be  
45 involved in planning and execution of motor output in comparable tasks to ours (Guo et al., 2014; Li et al.,  
46 2015). However, it remains unclear whether ALM is involved in evidence integration, or equally driven by  
47 sensory-guided versus random decisions. Our recordings show that many ALM neurons were mostly driven  
48 by internal backdrop whereas unique task-modulation was present but sparse. Furthermore, neural activity

1 in about half of all recorded ALM neurons was modulated by spontaneous movements but completely  
2 orthogonal to the task. The master circuitry for sensory-guided decisions may therefore lie mostly in non-  
3 dorsal areas such as orbitofrontal cortex (Kepecs et al., 2008) or subcortical regions like the dorsal striatum  
4 (Wang et al., 2018b), hippocampus (Aronov et al., 2017; Merre et al., 2017) or thalamus (Schmitt et al.,  
5 2017) and subsequently be relayed to ALM to create or sustain a motor plan. To address these questions,  
6 future studies should therefore combine more complex paradigms or subcortical recordings with close  
7 monitoring of animal movements and behavioral controls to disentangle differences between sensory-  
8 guided versus random decisions.

### 9 **Cortical activity is dominated by the internal backdrop**

10 Earlier studies that reported a large impact of the internal backdrop on cortical activity mostly focused on  
11 spontaneous behaviors like running on a wheel, where internal states may be particularly variable (Niell  
12 and Stryker, 2010; Vinck et al., 2015). One might assume that the internal state of task-performing animals  
13 is more constrained: animals are well-trained to the timing and contingencies of the task and perform the  
14 same behavior consistently over long periods of time, which might keep them in a less variable, attentive  
15 state (Harris and Thiele, 2011). This view is also supported by a reduction of trial-to-trial variance of cortical  
16 responses over the course of learning as behavioral performance increases (Ni et al., 2018). Our task  
17 design aimed to promote such a stable internal state by allowing mice to self-initiate trials, thereby ensuring  
18 that they were aware of an upcoming trial and willing to perform the task. Despite this, we found that the  
19 large majority of cortical activity was dominated by animal movements and internal state changes instead  
20 of the behavioral task.

21 The profound impact of the internal backdrop has important implications when analyzing neural dynamics  
22 during decision-making. Although task variables alone explained a considerable amount of variance in  
23 cortical data, only ~3% was uniquely explained by the task. Most neural dynamics that might have been  
24 considered task-related were therefore ambiguous and equally well explained by internal dynamics or  
25 movements. The prevalence of movement modulation across cortex may explain why task-related activity  
26 has been observed in a variety of cortical areas (Allen et al., 2017; Goard et al., 2016; Merre et al., 2017)  
27 and highlights the importance of additional controls like neural inactivation to test the relevance of a given  
28 area for decision-making.

29 Even in ALM, which had been identified as causal for behavior (Chen et al., 2017; Li et al., 2015), much of  
30 the observed single-cell dynamics may be due to ongoing movements. Many of our ALM neurons were  
31 strongly modulated in their trial average and exhibited dynamics that seemed reminiscent of evidence  
32 accumulation or urgency signals; nonetheless, their activity was often fully explained by movement  
33 variables (Fig. 4F). This argues that even when focusing on areas that have been identified with neural  
34 inactivation, much of the observed single-cell dynamics may be due to internal backdrop. To address this  
35 issue, our linear model could be leveraged to isolate neurons that are best explained by task variables,  
36 when taking movements into account. Careful quantification of animal behavior can therefore be utilized to  
37 uncover previously obscured task-related neural dynamics.

38 The large and widespread impact of movements may appear to be in contrast with earlier decision-making  
39 studies that mostly found a weak relation between neural activity and movements (Allen et al., 2017; Erlich  
40 et al., 2011). The main difference between these earlier findings and our current study is most likely the  
41 number of parameters used to describe animal behavior. Our model included a wide variety of different  
42 movements and we found that most of them contributed a substantial amount of unique predictive power  
43 (Fig. 2E). This means that each variable had a distinct impact on cortical activity that cannot be inferred  
44 from other movements. While individual movement variables were indeed less informative than the task  
45 model, combining all variables into a larger model led to a pronounced increase in predictive power (Fig.  
46 2G). This highlights the importance of tracking different sources for the internal backdrop when assessing  
47 their cumulative impact on cortical activity. Notably, our results are still a lower bound for how well neural  
48 activity can be predicted from observing animal behavior. Using more sophisticated machine vision analysis  
49 (Mathis et al., 2018) or additional sensors (Bollu et al., 2018) could result in far more detailed information

1 on animal movement or state changes. Such information may enable dissociating effects of state change  
2 from specific motor activity, and a deeper understanding of the physiological mechanisms through which  
3 different components of the internal backdrop modulate cortical activity.

4 Notably, using video data alone captured a significant amount of neural variance. This is in agreement with  
5 recent work that used PCA to extract facial features from video data, explaining large amounts of variance  
6 in dense recordings of many individual neurons in V1 and multiple other brain regions (Stringer et al., 2018).  
7 It is therefore possible to extract a surprisingly large amount of information on the animal's state by  
8 recording video data and using well-established linear analysis. Given the feasibility of this approach, we  
9 believe it should become standard practice to acquire video data during behavioral experiments.

10 Finally, the prominence of the internal backdrop raises the question of its role in cortical information  
11 processing. Historically, non-task related activity has often been described as random internal noise that is  
12 reduced when performing a behavioral task. Yet, this view seems largely incompatible with the tight  
13 coupling of 'spontaneous' activity to the animal movements and internal state that we describe here. Some  
14 earlier work in sensory areas has hypothesized that integration of specific motor feedback is advantageous  
15 for sensory processing, like the integration of running in visual areas for motion perception or predictive  
16 coding (Ayaz et al., 2013; Keller et al., 2012; Saleem et al., 2013). However, just as auditory and  
17 somatosensory cortices were also found to be modulated by running (Ayaz et al., 2018; Schneider et al.,  
18 2014; Shimaoka et al., 2018) our results may indicate that this concept is not specific to sensory processing  
19 but holds true on a much larger scale. It is not yet clear what purpose this large and widespread modulation  
20 serves. As previously speculated, it may relate to cancelling or tracking self-motion (Sommer and Wurtz,  
21 2008), gating of inputs (Schmitt et al., 2017); biasing circuits toward receptive 'ON' states (Engel et al.,  
22 2016), or permitting distributed associational learning (Engel et al., 2015; Wang et al., 2018a). Every cortical  
23 area, regardless of its specific computation, plays a potentially important role in case of unexpected  
24 feedback. Global transmission of the internal backdrop might therefore be a key component to broadcast  
25 behavioral context and flexibly adapt information processing in local cortical networks.

26

## 27 **Acknowledgements**

28 We thank Onyekachi Odoemene, Sashank Pisupati and Hien Nguyen for technical assistance and  
29 scientific discussions. Financial support was received from the Swiss National Science foundation (SM),  
30 the Pew Charitable Trusts (AKC) and the Simons Collaboration on the Global Brain (AKC, MTK).

## 1 **References**

- 2 Abrahامyan, A., Silva, L.L., Dakin, S.C., Carandini, M., and Gardner, J.L. (2016). Adaptable history biases  
3 in human perceptual decisions. *PNAS* *113*, E3548–E3557.
- 4 Allen, W.E., Kauvar, I.V., Chen, M.Z., Richman, E.B., Yang, S.J., Chan, K., Gradinaru, V., Deverman, B.E.,  
5 Luo, L., and Deisseroth, K. (2017). Global Representations of Goal-Directed Behavior in Distinct Cell  
6 Types of Mouse Neocortex. *Neuron* *94*, 891–907.e6.
- 7 Aronov, D., Nevers, R., and Tank, D.W. (2017). Mapping of a non-spatial dimension by the hippocampal–  
8 entorhinal circuit. *Nature* *543*, 719–722.
- 9 Ayaz, A., Saleem, A.B., Schölvinck, M.L., and Carandini, M. (2013). Locomotion controls spatial  
10 integration in mouse visual cortex. *Curr. Biol.* *23*, 890–894.
- 11 Ayaz, A., Staeuble, A., Saleem, A.B., and Helmchen, F. (2018). Layer-specific integration of locomotion  
12 and concurrent wall touching in mouse barrel cortex. *BioRxiv* 265165.
- 13 Batista-Brito, R., Vinck, M., Ferguson, K.A., Chang, J.T., Laubender, D., Lur, G., Mossner, J.M., Hernandez,  
14 V.G., Ramakrishnan, C., Deisseroth, K., et al. (2017). Developmental Dysfunction of VIP Interneurons  
15 Impairs Cortical Circuits. *Neuron* *95*, 884–895.e9.
- 16 Bichot, N.P., and Schall, J.D. (1999). Effects of similarity and history on neural mechanisms of visual  
17 selection. *Nat. Neurosci.* *2*, 549–554.
- 18 Bollu, T., Whitehead, S.C., Prasad, N., Walker, J.R., Shyamkumar, N., Subramaniam, R., Kardon, B.M.,  
19 Cohen, I., and Goldberg, J.H. (2018). Cortical control of kinematic primitives in mice performing a hold-  
20 still-center-out reach task. *BioRxiv* 304907.
- 21 Bouret, S., and Sara, S.J. (2004). Reward expectation, orientation of attention and locus coeruleus-  
22 medial frontal cortex interplay during learning. *Eur. J. Neurosci.* *20*, 791–802.
- 23 Chan, K.Y., Jang, M.J., Yoo, B.B., Greenbaum, A., Ravi, N., Wu, W.-L., Sánchez-Guardado, L., Lois, C.,  
24 Mazmanian, S.K., Deverman, B.E., et al. (2017). Engineered AAVs for efficient noninvasive gene delivery  
25 to the central and peripheral nervous systems. *Nat. Neurosci.* *20*, 1172–1179.
- 26 Chen, J.L., Carta, S., Soldado-Magraner, J., Schneider, B.L., and Helmchen, F. (2013). Behaviour-  
27 dependent recruitment of long-range projection neurons in somatosensory cortex. *Nature advance*  
28 *online publication*.
- 29 Chen, T.-W., Li, N., Daie, K., and Svoboda, K. (2017). A Map of Anticipatory Activity in Mouse Motor  
30 Cortex. *Neuron* *94*, 866–879.e4.
- 31 Crochet, S., and Petersen, C.C.H. (2006). Correlating whisker behavior with membrane potential in barrel  
32 cortex of awake mice. *Nat. Neurosci.* *9*, 608–610.
- 33 Engel, T.A., Chaisangmongkon, W., Freedman, D.J., and Wang, X.-J. (2015). Choice-correlated activity  
34 fluctuations underlie learning of neuronal category representation. *Nature Communications* *6*, 6454.

- 1 Engel, T.A., Steinmetz, N.A., Gieselmann, M.A., Thiele, A., Moore, T., and Boahen, K. (2016). Selective  
2 modulation of cortical state during spatial attention. *Science* 354, 1140–1144.
- 3 Erlich, J.C., Bialek, M., and Brody, C.D. (2011). A Cortical Substrate for Memory-Guided Orienting in the  
4 Rat. *Neuron* 72, 330–343.
- 5 Ferezou, I., Haiss, F., Gentet, L.J., Aronoff, R., Weber, B., and Petersen, C.C.H. (2007). Spatiotemporal  
6 dynamics of cortical sensorimotor integration in behaving mice. *Neuron* 56, 907–923.
- 7 Freedman, D.J., and Assad, J.A. (2006). Experience-dependent representation of visual categories in  
8 parietal cortex. *Nature* 443, 85–88.
- 9 Goard, M.J., Pho, G.N., Woodson, J., and Sur, M. (2016). Distinct roles of visual, parietal, and frontal  
10 motor cortices in memory-guided sensorimotor decisions. *ELife* 5, e13764.
- 11 Guo, Z.V., Li, N., Huber, D., Ophir, E., Gutnisky, D., Ting, J.T., Feng, G., and Svoboda, K. (2014). Flow of  
12 Cortical Activity Underlying a Tactile Decision in Mice. *Neuron* 81, 179–194.
- 13 Harris, K.D., and Thiele, A. (2011). Cortical state and attention. *Nat Rev Neurosci* *advance online*  
14 *publication*.
- 15 Harvey, C.D., Coen, P., and Tank, D.W. (2012). Choice-specific sequences in parietal cortex during a  
16 virtual-navigation decision task. *Nature* 484, 62–68.
- 17 Jia, H., Rochefort, N.L., Chen, X., and Konnerth, A. (2011). In vivo two-photon imaging of sensory-evoked  
18 dendritic calcium signals in cortical neurons. *Nat Protoc* 6, 28–35.
- 19 Karabatsos, G. (2017). Marginal maximum likelihood estimation methods for the tuning parameters of  
20 ridge, power ridge, and generalized ridge regression. *Communications in Statistics - Simulation and*  
21 *Computation*.
- 22 Katz, L.N., Yates, J.L., Pillow, J.W., and Huk, A.C. (2016). Dissociated functional significance of decision-  
23 related activity in the primate dorsal stream. *Nature* 535, 285–288.
- 24 Kawai, R., Markman, T., Poddar, R., Ko, R., Fantana, A.L., Dhawale, A.K., Kampff, A.R., and Ölveczky, B.P.  
25 (2015). Motor cortex is required for learning but not for executing a motor skill. *Neuron* 86, 800–812.
- 26 Keller, G.B., Bonhoeffer, T., and Hübener, M. (2012). Sensorimotor mismatch signals in primary visual  
27 cortex of the behaving mouse. *Neuron* 74, 809–815.
- 28 Kepecs, A., Uchida, N., Zariwala, H.A., and Mainen, Z.F. (2008). Neural correlates, computation and  
29 behavioural impact of decision confidence. *Nature* 455, 227–231.
- 30 Lerner, T.N., Shilyansky, C., Davidson, T.J., Evans, K.E., Beier, K.T., Zalocusky, K.A., Crow, A.K., Malenka,  
31 R.C., Luo, L., Tomer, R., et al. (2015). Intact-Brain Analyses Reveal Distinct Information Carried by SNC  
32 Dopamine Subcircuits. *Cell* 162, 635–647.
- 33 Li, N., Chen, T.-W., Guo, Z.V., Gerfen, C.R., and Svoboda, K. (2015). A motor cortex circuit for motor  
34 planning and movement. *Nature* 519, 51–56.



- 1 Licata, A.M., Kaufman, M.T., Raposo, D., Ryan, M.B., Sheppard, J.P., and Churchland, A.K. (2017).
- 2 Posterior Parietal Cortex Guides Visual Decisions in Rats. *J. Neurosci.* *37*, 4954–4966.
- 3 Manoach, D.S., Thakkar, K.N., Cain, M.S., Polli, F.E., Edelman, J.A., Fischl, B., and Barton, J.J.S. (2007).
- 4 Neural activity is modulated by trial history: a functional magnetic resonance imaging study of the
- 5 effects of a previous antisaccade. *J. Neurosci.* *27*, 1791–1798.
- 6 Marshel, J.H., Garrett, M.E., Nauhaus, I., and Callaway, E.M. (2011). Functional Specialization of Seven
- 7 Mouse Visual Cortical Areas. *Neuron* *72*, 1040–1054.
- 8 Mathis, A., Mamidanna, P., Abe, T., Cury, K.M., Murthy, V.N., Mathis, M.W., and Bethge, M. (2018).
- 9 Markerless tracking of user-defined features with deep learning. ArXiv:1804.03142 [Cs, q-Bio, Stat].
- 10 Meister, M.L.R., Hennig, J.A., and Huk, A.C. (2013). Signal multiplexing and single-neuron computations
- 11 in lateral intraparietal area during decision-making. *J. Neurosci.* *33*, 2254–2267.
- 12 Merre, P.L., Esmaili, V., Charrière, E., Galan, K., Salin, P.-A., Petersen, C.C.H., and Crochet, S. (2017).
- 13 Reward-Based Learning Drives Rapid Sensory Signals in Medial Prefrontal Cortex and Dorsal
- 14 Hippocampus Necessary for Goal-Directed Behavior. *Neuron* *0*.
- 15 Mineault, P.J., Tring, E., Trachtenberg, J.T., and Ringach, D.L. (2016). Enhanced Spatial Resolution During
- 16 Locomotion and Heightened Attention in Mouse Primary Visual Cortex. *J. Neurosci.* *36*, 6382–6392.
- 17 Morcos, A.S., and Harvey, C.D. (2016). History-dependent variability in population dynamics during
- 18 evidence accumulation in cortex. *Nat Neurosci advance online publication*.
- 19 Mumford, J.A., Poline, J.-B., and Poldrack, R.A. (2015). Orthogonalization of Regressors in fMRI Models.
- 20 *PLOS ONE* *10*, e0126255.
- 21 Ni, A.M., Ruff, D.A., Alberts, J.J., Symmonds, J., and Cohen, M.R. (2018). Learning and attention reveal a
- 22 general relationship between population activity and behavior. *Science* *359*, 463–465.
- 23 Niell, C.M., and Stryker, M.P. (2010). Modulation of Visual Responses by Behavioral State in Mouse
- 24 Visual Cortex. *Neuron* *65*, 472–479.
- 25 O’Connor, D.H., Hires, S.A., Guo, Z.V., Li, N., Yu, J., Sun, Q.-Q., Huber, D., and Svoboda, K. (2013). Neural
- 26 coding during active somatosensation revealed using illusory touch. *Nat Neurosci* *16*, 958–965.
- 27 Okun, M., Steinmetz, N.A., Cossell, L., Iacaruso, M.F., Ko, H., Barthó, P., Moore, T., Hofer, S.B., Mrsic-
- 28 Flogel, T.D., Carandini, M., et al. (2015). Diverse coupling of neurons to populations in sensory cortex.
- 29 *Nature* *521*, 511–515.
- 30 Pachitariu, M., Lyamzin, D.R., Sahani, M., and Lesica, N.A. (2015). State-Dependent Population Coding in
- 31 Primary Auditory Cortex. *J. Neurosci.* *35*, 2058–2073.
- 32 Pachitariu, M., Stringer, C., Schröder, S., Dipoppa, M., Rossi, L.F., Carandini, M., and Harris, K.D. (2016).
- 33 Suite2p: beyond 10,000 neurons with standard two-photon microscopy. *BioRxiv* 061507.

- 1 Park, I.M., Meister, M.L.R., Huk, A.C., and Pillow, J.W. (2014). Encoding and decoding in parietal cortex  
2 during sensorimotor decision-making. *Nat. Neurosci.* *17*, 1395–1403.
- 3 Pinto, L., Koay, S.A., Engelhard, B., Yoon, A.M., Deverett, B., Thiberge, S.Y., Witten, I., Tank, D.W., and  
4 Brody, C. (2018). An accumulation-of-evidence task using visual pulses for mice navigating in virtual  
5 reality. *BioRxiv* 232702.
- 6 Polack, P.-O., Friedman, J., and Golshani, P. (2013). Cellular mechanisms of brain state-dependent gain  
7 modulation in visual cortex. *Nature Neuroscience* *16*, 1331–1339.
- 8 Powell, K., Mathy, A., Duguid, I., and Häusser, M. (2015). Synaptic representation of locomotion in single  
9 cerebellar granule cells. *ELife Sciences* *4*, e07290.
- 10 Pratt, W.E., and Mizumori, S.J. (2001). Neurons in rat medial prefrontal cortex show anticipatory rate  
11 changes to predictable differential rewards in a spatial memory task. *Behav. Brain Res.* *123*, 165–183.
- 12 Raposo, D., Kaufman, M.T., and Churchland, A.K. (2014). A category-free neural population supports  
13 evolving demands during decision-making. *Nat Neurosci* *17*, 1784–1792.
- 14 Ratzlaff, E.H., and Grinvald, A. (1991). A tandem-lens epifluorescence microscope: hundred-fold  
15 brightness advantage for wide-field imaging. *J. Neurosci. Methods* *36*, 127–137.
- 16 Reimer, J., Froudarakis, E., Cadwell, C.R., Yatsenko, D., Denfield, G.H., and Tolias, A.S. (2014). Pupil  
17 fluctuations track fast switching of cortical states during quiet wakefulness. *Neuron* *84*, 355–362.
- 18 Rishel, C.A., Huang, G., and Freedman, D.J. (2013). Independent Category and Spatial Encoding in  
19 Parietal Cortex. *Neuron* *77*, 969–979.
- 20 Roitman, J.D., and Shadlen, M.N. (2002). Response of neurons in the lateral intraparietal area during a  
21 combined visual discrimination reaction time task. *J. Neurosci.* *22*, 9475–9489.
- 22 Saleem, A.B., Ayaz, A., Jeffery, K.J., Harris, K.D., and Carandini, M. (2013). Integration of visual motion  
23 and locomotion in mouse visual cortex. *Nat. Neurosci.* *16*, 1864–1869.
- 24 Schmitt, L.I., Wimmer, R.D., Nakajima, M., Happ, M., Mofakham, S., and Halassa, M.M. (2017). Thalamic  
25 amplification of cortical connectivity sustains attentional control. *Nature* *545*, 219–223.
- 26 Schneider, D.M., Nelson, A., and Mooney, R. (2014). A synaptic and circuit basis for corollary discharge in  
27 the auditory cortex. *Nature* *513*, 189–194.
- 28 Shimaoka, D., Harris, K.D., and Carandini, M. (2018). Effects of Arousal on Mouse Sensory Cortex Depend  
29 on Modality. *Cell Reports* *22*, 3160–3167.
- 30 Sommer, M.A., and Wurtz, R.H. (2008). Brain circuits for the internal monitoring of movements. *Annu*  
31 *Rev Neurosci* *31*, 317.
- 32 Steinmetz, N.A., Buettner, C., Lecoq, J., Lee, C.R., Peters, A.J., Jacobs, E.A.K., Coen, P., Ollerenshaw,  
33 D.R., Valley, M.T., Vries, S.E.J. de, et al. (2017). Aberrant Cortical Activity in Multiple GCaMP6-Expressing  
34 Transgenic Mouse Lines. *ENeuro* ENEURO.0207-17.2017.

- 1 Stringer, C., Pachitariu, M., Steinmetz, N., Reddy, C.B., Carandini, M., and Harris, K.D. (2018).
- 2 Spontaneous behaviors drive multidimensional, brain-wide population activity. *BioRxiv* 306019.
- 3 Vinck, M., Batista-Brito, R., Knoblich, U., and Cardin, J.A. (2015). Arousal and Locomotion Make Distinct
- 4 Contributions to Cortical Activity Patterns and Visual Encoding. *Neuron* 86, 740–754.
- 5 Wang, J.X., Kurth-Nelson, Z., Kumaran, D., Tirumala, D., Soyer, H., Leibo, J.Z., Hassabis, D., and Botvinick,
- 6 M. (2018a). Prefrontal cortex as a meta-reinforcement learning system. *BioRxiv* 295964.
- 7 Wang, L., Rangarajan, K.V., Gerfen, C.R., and Krauzlis, R.J. (2018b). Activation of Striatal Neurons Causes
- 8 a Perceptual Decision Bias during Visual Change Detection in Mice. *Neuron* 97, 1369–1381.e5.
- 9 Wechselblatt, J.B., Flister, E.D., Piscopo, D.M., and Niell, C.M. (2016). Large-scale imaging of cortical
- 10 dynamics during sensory perception and behavior. *Journal of Neurophysiology* 115, 2852–2866.
- 11

## 1 Figure Legends

### 2 **Figure 1. Widefield calcium imaging during auditory and visual decision making.**

3 **(A)** Bottom view of a mouse in the behavioral setup. **(B)** Single-trial timing of behavior. Mice held the  
4 handles for ~1 s to trigger the stimulus sequence. After a 1 s delay, water spouts moved in so mice could  
5 report a choice. **(C)** Expert vs. novice behavior. Visual experts (blue) had high performance with visual but  
6 novice performance with auditory stimuli. Auditory experts (green) showed the opposite. Thin lines show  
7 individual animals, thick show averages. Error bars represent mean  $\pm$  s.e.m. **(D)** Schematic of widefield  
8 macroscope. Alternating blue and violet excitation light was projected on the brain surface. Green emission  
9 light was captured by an sCMOS camera through two macro lenses. **(E)** Example visual sign map, aligned  
10 to Allen CCF. Mapped areas largely agreed with corresponding locations of visual areas in the CCF (white  
11 lines). **(F)** Cortical activity during different task episodes averaged over 11 mice. Shown are responses  
12 when holding the handles ('Hold'), visual stimulus presentation ('Stim 1&2'), the subsequent delay ('Delay')  
13 and the response period ('Response'). In each trial, stimulus onset was pseudo-randomized within a 0.25  
14 s long time window (inset). **(G)** Left: Traces show average responses in V1, retrosplenial cortex (RS),  
15 hindlimb somatosensory cortex (HL) and secondary motor cortex (M2) on the right hemisphere during visual  
16 (black) or auditory (red) stimulation. Trial averages are double-aligned to the time of trial initiation (left  
17 dashed line) and stimulus onset (gray bars). Right dashed line indicates response period, shading indicates  
18 s.e.m. Right:  $d'$  between visual and auditory trials during first visual stimulus (top) and the subsequent delay  
19 period (bottom). **(H)** Same as (G) but for correct visual trials on the left versus right side. **(I)** Same as (G)  
20 but for expert versus novice modality.

21

### 22 **Figure 2. A linear model to reveal behavioral correlates of cortical activity.**

23 **(A)** Schematic of the linear model. Behavioral variables were encoded with regressor sets (Step 1) that  
24 were combined into a design matrix (Step 2). A single-trial example shows regressors for a rightward  
25 stimulus, animal licks, animal success and hindpaw movement. Each regressor is assigned a  $\beta$ -weight via  
26 ridge regression, describing its impact on each pixel (Step 3). Multiplying regressors with their respective  
27 weights allows reconstruction of the imaging data (Step 4). **(B)** Example image of facial video camera.  
28 Video data was used to extract pupil diameter, whisker and nose motion. A reduced-dimensionality version  
29 was also included as a model variable. **(C)** Maps of  $\beta$ -weights for right visual stimulus or grabbing the right  
30 handle, 100 ms after event onset. **(D)** Maps of cross-validated explained variance for different episodes of  
31 the task. **(E)** Explained variance for individual model variables. Shown is either all explained variance (light  
32 green) or unique explained variance (dark green). Values averaged across cortex, bars represent mean  $\pm$   
33 s.e.m over 22 sessions. Y-axis scale differs for all vs. unique variance. Nov.: novice; Exp.: expert; Prev.:  
34 previous. **(F)** Maps of unique explained variance for right visual stimulus or grabbing the right handle. **(G)**  
35 Explained variance for groups of model variables. Conventions as in (E), white bar indicates explained  
36 variance of the full model. Exp.: explained. **(H)** Maps of unique explained variance for groups of model  
37 variables. Area outlines indicate V1 and HL. **(I)** Example traces from two visual trials in areas V1 (bottom)  
38 and HL (top). Gray traces indicate recorded imaging data, purple and orange traces indicate predictions  
39 from a movement-only or task-only model, respectively. The movement model predicted single trial  
40 dynamics more accurately than the task model.

41

### 42 **Figure 3. Accounting for internal backdrop benefits the interpretation of trial-averaged data. (A)**

43 Explained variance for individual movement variables. Shown is either unique, task-independent (dark blue)  
44 or task-shared explained variance (light blue). Values averaged across cortex, bars represent mean  $\pm$  s.e.m  
45 over 22 sessions. **(B)** Trial-averaged data for areas V1 and M2. Top row shows averaged imaging (black  
46 traces) and modeled (red traces) data over all trials. Bottom row shows average reconstructions based on  
47 either movement or task variables alone, using weights from the full model. Dashed boxes show post-  
48 stimulus period in M2 that is jointly modulated by movement and task variables. Trial-averages are aligned

1 to the time of trial initiation (dashed line) as well as stimulus onset (gray bars). Right dashed line indicates  
2 response period, shading indicates s.e.m. **(C)** Cortical maps of task-based reconstructions as shown in  
3 green in (B). Shown are average modulation during the first and second stimulus and the delay period. **(D)**  
4 Absolute modulation of trial averages for either the task or movement model. **(E)** Cortical map of the task  
5 modulation index. Dashed circle indicates location of ALM.

6

7 **Figure 4. Accounting for internal backdrop benefits the interpretation of single-neuron data. (A)**  
8 Trial-averaged activity for example neurons. Colors indicate responses to left/right auditory stimuli (blue)  
9 and left/right visual stimuli (green). **(B)** Explained variance for individual model variables. Shown is either  
10 all explained variance (light green) or unique explained variance (dark green). Values are averaged across  
11 all neurons, mean  $\pm$  s.e.m over 315 cells. Y-axis scale differs for all vs. unique variance. Nov.: novice; Exp.:  
12 expert; Prev.: previous. **(C)** Explained variance for groups of model variables. Conventions as in (B), white  
13 bar indicates all explained variance of the full model. Exp.: explained. **(D)** Explained variance of individual  
14 neurons, sorted by full-model performance (red traces). Light blue trace shows explained variance of a  
15 movement-only model, dark blue shows the unique explained variance by movement (same as light/dark  
16 green bars in C). Light/dark green traces show full/unique explained variance by the task model. **(E)**  
17 Absolute modulation of single-cell trial averages due to task or movement variables. Green bars show  
18 average deviations due to task variables, blue bars due to movement variables. Neurons are sorted by  
19 absolute deviation of the trial average. Bar plots stacked. **(F)** Linear model reveals tuning preference of  
20 individual neurons. Blue box: single cell trial average with substantial modulation after stimulus onset (gray  
21 bars) and increasing activity before the response period, that is well-explained by movement variables.  
22 Green box: cell with strong modulation that is largely explained by task variables. Dashed lines indicate trial  
23 initiation, shading is s.e.m over trials.

## 1 **Methods**

### 2 **Animal Subjects**

3 The Cold Spring Harbor Laboratory Animal Care and Use Committee approved all animal procedures and  
4 experiments. Experiments were conducted with male mice from the ages of 6-25 weeks. All mouse strains  
5 were of C57BL/6J background and purchased from Jackson Laboratory. Four transgenic strains were  
6 crossed to create the transgenic mice used for imaging: Emx-Cre (JAX 005628), LSL-tTA (JAX 008600),  
7 CaMK2 $\alpha$ -tTA (JAX 003010) and Ai93 (JAX 024103). All trained mice were housed in groups of two or more  
8 under an inverted 12:12-h light-dark regime and trained during their active dark cycle.

### 9 **Surgical procedures**

10 All surgeries were performed under 1-2% isoflurane in oxygen anesthesia. After induction of anesthesia,  
11 1.2 mg/kg of Meloxicam was injected subcutaneously and Lidocaine ointment was topically applied to the  
12 skin. After making a medial incision, the skin was pushed to the side and fixed in position with tissue  
13 adhesive (Vetbond, 3M). We then created an outer wall using dental cement (Ortho-Jet, Lang Dental) while  
14 leaving as much of the skull exposed as possible. A circular headbar was attached to the dental cement.  
15 For widefield imaging, after carefully cleaning the exposed skull we applied a layer of cyanoacrylate (Zap-  
16 A-Gap CA+, Pacer technology) to clear the bone. After the cyanoacrylate was cured, cortical blood vessels  
17 were clearly visible.

18 For two photon imaging, instead of clearing the skull, we performed a circular craniotomy using a biopsy  
19 punch (diameter: 3 mm), centered 1.5 mm lateral and 1.5 mm anterior to bregma. We then positioned a  
20 circular coverslip window over the cortex and sealed the remaining gap between the bone and glass with  
21 tissue glue. The window was then secured to the skull using C&B Metabond (Parkell) and the remaining  
22 exposed skull was sealed using dental cement. After surgery, animals were kept on a heating mat for  
23 recovery and a daily dose of analgesia (1.2 mg/kg Meloxicam) and antibiotics (2.3 mg/kg Enrofloxacin)  
24 were administered subcutaneously for at least 3 days.

### 25 **Behavior**

26 The behavioral setup was based on an Arduino-controlled finite state machine (Bpod r0.5, Sanworks) and  
27 custom Matlab code (2015b, Mathworks) running on a linux PC. Servo motors (Turnigy TGY-306G-HV) and  
28 visual stimuli were controlled by microcontrollers (Teensy 3.2, PJRC) running custom code. Eleven mice  
29 were trained on a delayed 2-alternative forced choice (2AFC) spatial discrimination task. Mice initiated trials  
30 by touching either of two handles with their forepaws. Handles were mounted on servo motors and were  
31 moved out of reach between trials. After one second of holding a handle, sensory stimuli were presented.  
32 Sensory stimuli consisted of either a sequence of auditory clicks, or repeated presentation of a visual  
33 moving bar (3 repetitions, 200 ms each). Auditory stimuli were presented from either a left or right speaker,  
34 and visual stimuli were presented on one of two small LED displays on the left or right side. The sensory  
35 stimulus was presented for 600 ms, there was a 500 ms pause with no stimulus, and then the stimulus was  
36 repeated for another 600 ms. The 500 ms inter-stimulus period was added to allow probing neural dynamics  
37 during potential decision formation in the absence of sensory stimuli. After the second stimulus, a 1000 ms  
38 delay was imposed, then servo motors moved two lick spouts into close proximity of the animal's mouth. If  
39 the animal licked twice to the spout on the same side as the stimulus, he was rewarded with a drop of water.  
40 After one spout was contacted twice, the other spout was moved out of reach to force the animal to commit  
41 to its initial decision.

42 Animals were trained over the course of approximately 30 days. After 2-3 days of restricted water access,  
43 animals were head-fixed and received water in the setup. Water was given by presenting a sensory  
44 stimulus, subsequently moving the correct spout close to the animal and dispensing water automatically.  
45 After several habituation sessions, animals had to touch the handles to trigger the stimulus presentation.  
46 Once animals reliably reached for the handles, the required touch duration was gradually increased up to  
47 1 second. Lastly, the probability for fully self-performed trials, at which both spouts were moved towards

1 the animal after stimulus presentation, was gradually increased until animals reached stable detection  
2 performance levels of 80% or higher.

3  
4 Each animal was trained exclusively on a single modality (6 visual animals, 5 auditory). Only during imaging  
5 sessions were trials of the untrained modality presented as well. This allowed us to compare neural activity  
6 on trials where animals performed sensory guided decision-making versus trials where animal decisions  
7 were random. To ensure that detection performance was not overly affected by presentation of the  
8 untrained modality, the trained modality was presented in 75% and the untrained modality in 25% of all  
9 trials.

## 10 **Behavioral sensors**

11 We used information from several sensors in the behavioral setup to measure different aspects of animal  
12 movement. The handles detected contact with the animal's forepaws, and the lick spouts detected contact  
13 with the tongue. An additional piezo sensor below the animal's trunk was used to detect hindpaw and whole-  
14 body movements. Sensor data was normalized and thresholded at 2 standard deviations to extract hindpaw  
15 movements. Based on hindpaw events we created a binary peri-event design matrix that was also included  
16 in the linear model (see below).

## 17 **Video monitoring**

18 Two webcams (C920 and B920, Logitech) were used to monitor animal movements. Cameras were  
19 positioned to capture the animal's face (side view) and the body (bottom view). To target particular  
20 behavioral variables of interest, we defined subregions of the video which were then examined in more  
21 detail. These included a region surrounding the eye, the whisker pad and the nose. From the eye region  
22 we extracted changes in pupil diameter using custom Matlab code. To analyze whisker movements, we  
23 computed the absolute temporal derivative averaged over the entire whisker pad. The resulting 1-D trace  
24 was then normalized and thresholded at 2 standard deviations to extract whisking events. Based on  
25 whisking events we created a binary peri-event design matrix that was also included in the linear model  
26 (see below). The same approach was used for the nose and pupil diameter.

## 27 **Widefield imaging**

28 Widefield imaging was done using an inverted tandem-lens microscope (Grinvald et al., 1991) in  
29 combination with an sCMOS camera (Edge 5.5, PCO) running at 60 fps. The top lens had a focal length of  
30 105 mm (DC-Nikkor, Nikon) and the bottom lens 85 mm (85M-S, Rokinon), resulting in a magnification of  
31 1.24x. The total field of view was 12.5 x 10.5 mm and the image resolution was 640 x 540 pixels after 4x  
32 spatial binning (spatial resolution: ~20 $\mu$ m/pixel). To capture GCaMP fluorescence, a 500 nm long-pass filter  
33 (ET500lp, Chroma) was placed in front of the camera. Excitation light was projected on the cortical surface  
34 using a 495 nm long-pass dichroic mirror (T495lpxr, Chroma) placed between the two macro lenses. The  
35 excitation light was generated by a collimated blue LED (470 nm, M470L3, Thorlabs) and a collimated violet  
36 LED (405 nm, M405L3, Thorlabs) that were coupled into the same excitation path using a dichroic mirror  
37 (#87-063, Edmund optics). We alternated illumination between the two LEDs from frame to frame, resulting  
38 in one set of frames with blue and the other with violet excitation at 30 fps each. Excitation of GCaMP at  
39 405 nm results in non-calcium dependent fluorescence (Lerner et al., 2015), allowing us to isolate the true  
40 calcium-dependent signal by rescaling and subtracting frames with violet illumination from the preceding  
41 frames with blue illumination (Allen et al., 2017). All subsequent analysis was based on this differential  
42 signal at 30 fps.

## 43 **Two-photon imaging**

44 Two-photon imaging was performed in 2 mice (visual experts) with a resonant-scanning two-photon  
45 microscope (Sutter Instruments, Movable Objective Microscope, configured with the "Janelia" option for  
46 collection optics), a Ti:Sapphire femtosecond pulsed laser (Ultra II, Coherent Inc.), and a 16X 0.8 NA  
47 objective (Nikon Instruments). Images were acquired at 30.9 Hz with an excitation wavelength of 930 nm.

1 All focal planes were between 140-150  $\mu\text{m}$  below the pial surface. The objective height was manually  
2 adjusted during recording in 1-2  $\mu\text{m}$  increments as often as necessary to maintain the same focal plane.  
3 Images were processed using Suite2P (Pachitariu et al., 2016) with model-based background subtraction.  
4 Sessions yielded 63-126 neurons each, for 271-529 behavioral trials.

## 5 **Preprocessing of neural data**

6 To analyze widefield data, we used SVD to compute the 200 highest-variance dimensions. These  
7 dimensions accounted for at least 88% of the total variance in the data. Using 500 dimensions accounted  
8 for little additional variance ( $\sim 0.15\%$ ), indicating that additional dimensions were mostly capturing recording  
9 noise. SVD returns 'spatial components'  $U$  (of size pixels x components), 'temporal components'  $V^T$  (of size  
10 components x frames) and singular values  $S$  (of size components x components) to scale components to  
11 match the original data. To reduce computational cost, all subsequent analysis was performed on the  
12 product  $SV^T$ .  $SV^T$  was high-pass filtered above 0.1Hz using a second-order Butterworth filter. Results of  
13 analyses on  $SV^T$  were later multiplied with  $U$ , to recover results for the original pixel space. All widefield  
14 data was rigidly aligned to the Allen Common Coordinate Framework v3, using four anatomical landmarks:  
15 the left, center, and right points where anterior cortex meets the olfactory bulbs and the medial point at the  
16 base of retrosplenial cortex.

17 To analyze 2p data, Suite2P was used to perform rigid motion correction on the image stack, identify  
18 neurons, extract their fluorescence, and correct for neuropil contamination (Pachitariu et al., 2016).  $\Delta F/F$   
19 traces were produced using the method of Jia et al. (Jia et al., 2011), skipping the final filtering step. Using  
20 these traces, we produced a matrix of size neurons x time, and treated this similarly to  $SV^T$  above. Finally,  
21 we confirmed imaging stability by examining the average firing rate of neurons over trials. If this varied  
22 substantially at the beginning or end of a session, the unstable portion was discarded.

23 To compute trial-averages, imaging data were double-aligned to the time when animals initiated a trial and  
24 to the stimulus onset. After alignment, single trials consisted of 1.8 s of baseline, 0.83 s of handle touch  
25 and 3.3 s following stimulus onset. The randomized additional interval between initiation and stimulus onset  
26 (0 - 0.25 s) was discarded in each trial and the resulting trials of equal length were averaged together.

## 27 **Linear model**

28 The linear model was constructed by combining multiple sets of regressors into a design matrix, to capture  
29 signal modulation by different task or motor events (Fig. 2A). Each regressor set (except for 'analog'  
30 regressors) was based on a single binary vector that contained a pulse at the time of the relevant event.  
31 To produce the regressor set, we repeated this vector with each copy being shifted in time by one frame  
32 relative to the original. For sensory stimuli, we created post-event regressor sets spanning all frames from  
33 stimulus onset until the end of the trial. For motor events like licking or whisking, we created peri-event  
34 regressor sets that spanned the frames from 0.5 s before until 1 s after each event. Lastly, we created  
35 whole-trial regressors, covering each frame in a given trial. Whole-trial regressors were aligned to stimulus  
36 onset and contained information about decision variables, such as animal choice or whether a given trial  
37 was rewarded. The model also contained several analog (non-binary) regressors, such as 1-D regressors  
38 for pupil diameter. To capture animal movements, we used SVD to compute the 200 highest dimensions of  
39 video information in both cameras. SVD was performed either on the raw video data ('video') or the absolute  
40 temporal derivative ('video ME'). SVD analysis of behavioral video was the same as for the widefield data,  
41 and we used the product  $SV^T$  of temporal components and singular values as analog regressors in the  
42 linear model. We did not use lagged versions of the analog regressors, including the video regressors.

43 To use video data regressors, it was important to ensure that they would not contain explanatory power  
44 from other model variables like licking and whisking that can also be inferred from video data. To accomplish  
45 this, we first created a reduced design matrix  $X_r$ , containing all movement regressors as well as times when  
46 spouts or handles were moving.  $X_r$  was ordered so that the motion energy and video columns were at the  
47 end. We then performed a QR decomposition of  $X_r$  (Mumford et al., 2015). The QR decomposition of a



- 1 matrix  $A$  is  $A = QR$ , where  $Q$  is an orthonormal matrix and  $R$  is upper triangular. Columns 1 to  $j$  of  $Q$  therefore  
 2 span the same space as columns 1 to  $j$  of  $A$  for all  $j$ , but all the columns are orthogonal to one another.  
 3 Finally, we replaced the motion and video columns of the full design matrix  $X$  with the corresponding  
 4 columns of  $Q$ . This allowed the model to improve the fit to the data using any unique contributions of the  
 5 motion and video regressors, while ensuring that the weights given to other regressors were not altered.
- 6 The following table provides an overview of all model variables and how they were generated:

| Variable name          | Description                                               | Regressor type             | Category |
|------------------------|-----------------------------------------------------------|----------------------------|----------|
| Hindpaw                | Piezo sensor below the animal                             | Analog + Peri-event matrix | Movement |
| Handles (Left / Right) | Touch events from handle sensors                          | Peri-event matrix          | Movement |
| Licks (Left / Right)   | Lick events from spout sensors                            | Peri-event matrix          | Movement |
| Pupil                  | Pupil diameter, extracted from face camera                | Analog + Peri-event matrix | Movement |
| Nose                   | Nose movements, extracted from face camera                | Analog + Peri-event matrix | Movement |
| Whisking               | Whisker movements, extracted from face camera             | Analog + Peri-event matrix | Movement |
| Body                   | Average motion energy across all body camera pixels       | Analog + Peri-event matrix | Movement |
| Video                  | Video dimensions from both cameras (SVD)                  | Analog                     | Movement |
| Video ME               | Video dimensions from motion energy in both cameras (SVD) | Analog                     | Movement |
| Time                   | All trials                                                | Whole-trial event matrix   | Task     |
| Choice                 | All leftward choice trials                                | Whole-trial event matrix   | Task     |
| Previous choice        | Every trial after a leftward choice trial                 | Whole-trial event matrix   | Task     |
| Previous modality      | Every trial after a visual trial                          | Whole-trial event matrix   | Task     |
| Previous success       | Every trial after a successful trial                      | Whole-trial event matrix   | Task     |
| Novice success         | All successful non-expert trials                          | Whole-trial event matrix   | Task     |
| Expert success         | All successful expert trials                              | Whole-trial event matrix   | Task     |
| Water given            | All frames after a reward was given                       | Post-event matrix          | Task     |
| Left audio             | All frames after a leftward auditory stimulus             | Post-event matrix          | Task     |
| Right audio            | All frames after a rightward auditory stimulus            | Post-event matrix          | Task     |
| Left vision            | All frames after a leftward visual stimulus               | Post-event matrix          | Task     |
| Right vision           | All frames after a rightward visual stimulus              | Post-event matrix          | Task     |

- 7  
 8 When a design matrix has columns that are close to linearly dependent (multicollinear), model fits are not  
 9 reliable. To test for this, we devised a novel method we call “cumulative subspace angles.” The idea is that

1 for each column of the design matrix, we wish to know how far it lies from the space spanned by the previous  
2 columns (note that pairwise angles do not suffice to determine multicollinearity). Our method works as  
3 follows: (1) the columns of the matrix were normalized to unit magnitude, (2) a QR decomposition of  $X$  was  
4 performed, (3) the absolute value of the elements along the diagonal of  $R$  were examined. Each of these  
5 values is the absolute dot product of the original vector with the same vector orthogonalized relative to all  
6 previous vectors. The values range from zero to one, where zero indicates complete degeneracy and one  
7 indicates no multicollinearity at all. Over all experiments, the most collinear regressor received a 0.26,  
8 indicating that it was  $15^\circ$  from the space of all other regressors. The average value was 0.84, corresponding  
9 to a mean angle of  $57^\circ$ .

10 To avoid overfitting, the model was fit using ridge regression. The regularization penalty was estimated  
11 separately for each column of the widefield data using marginal maximum likelihood estimation  
12 (Karabatsos, 2017) with minor modifications that reduced numerical instability for large regularization  
13 parameters.

#### 14 **Variance analysis**

15 Explained variance ( $R^2$ ) was obtained using 10-fold cross-validation. To compute all explained variance by  
16 individual model variables, we created reduced models where all regressors that did not correspond to a  
17 given variable were shuffled in time. The explained variance by each reduced model revealed the maximum  
18 potential predictive power of the corresponding model variable.

19 To assess unique explained variance by individual variables, we created reduced models for each variable  
20 where only the corresponding regressor set was shuffled in time. The difference in explained variance  
21 between the full and the reduced model yielded the unique contribution  $\Delta R^2$  of that model variable. The  
22 same approach was used to compute unique contributions for groups of variables, i.e., 'movement' or 'task'.  
23 Here, all variables that corresponded to a given group were shuffled at once.

24 To compute the 'task-shared' or 'task-independent' explained variance for each movement variable, we  
25 created reduced models where all movement variables were shuffled in time. This task-only model was  
26 then compared to other reduced models where all movement variables but one were shuffled. The  
27 difference between the task-only model and this model yielded the task-independent contribution of that  
28 movement variable. The task-shared contribution was the difference between the total variance explained  
29 by a given variable and its task-independent contribution.

#### 30 **Model-based reconstruction of trial-averages**

31 Reconstructed trial averages (Figs. 3 and 4) were produced by fitting the full model and averaging the  
32 reconstructed data over all trials. To split the model into the respective contributions of movement and task  
33 variables, we reconstructed the data based on either the movement or task variables alone (using the  
34 weights as in the full model) and averaging over all trials. To evaluate the relative impact of task variables  
35 on the trial average, we computed a task modulation index (TI), defined as

$$36 \quad TI = \frac{\left(1 + \frac{\Delta\text{Task} - \Delta\text{Movement}}{\Delta\text{Task} + \Delta\text{Movement}}\right)}{2},$$

37 where  $\Delta\text{Task}$  and  $\Delta\text{Movement}$  denote the mean absolute deviation of the reconstructed trial average based  
38 on either task or movement variables. The TI ranges from 0 (fully motor related) to 1 (fully task related).  
39 Intermediate values denote a mixed contribution of task and motor regressors to the trial average.

#### 40 **Model-based video reconstruction**

41 To better understand how the video related to the neural data, we analyzed the portion of the  $\beta$ -weight  
42 matrix that corresponded to the video regressors. This portion of the matrix was projected back up into the  
43 original video space. The result was of size  $p \times d$ , where  $p$  is the number of video pixels (153,600) and  $d$  is  
44 the number of dimensions of the widefield data (200). We performed PCA on this matrix, reducing the

1 number of rows. The top few 'scores' (projections onto the principal components) are low-dimensional  
2 representations of the widefield maps that were most strongly influenced by the video. To choose the  
3 dimensionality, we used the number of dimensions required to account for >90% of the variance (Fig. S3A).  
4 To obtain the widefield maps showing how the video was related to neural activity (Fig. S3B), we projected  
5 the scores back into widefield data pixel space and sparsened them using the varimax rotation. To  
6 determine the influence of each video pixel on the widefield (Fig. S3C), we projected the low-dimensional  
7  $\beta$ -weights into video pixel space, took the magnitude of the  $\beta$ -weights for each pixel, and multiplied by the  
8 standard deviation for that pixel.

### 9 **Aberrant cortical activity in Ai93 transgenic animals**

10 Mice with both Emx-Cre and Ai93 transgenes can exhibit aberrant, epileptiform cortical activity patterns,  
11 especially when expressing GCaMP6 during development (Steinmetz et al., 2017). To avoid this issue, we  
12 raised most of our mice (6 mice) on a doxycycline-containing diet (DOX), preventing GCaMP6 expression  
13 until they were 6 weeks or older. However, 5 mice were raised on standard diet, raising the concern that  
14 aberrant activity may have affected our results.

15 To test for presence of epileptiform activity, we used the same comparison as Steinmetz et al. on the cortex-  
16 wide average. A peak in cortical activity was flagged as a potential interictal event if it had a width of 60-  
17 235 ms and a prominence of 0.03 or higher. These parameters flagged nearly all cases of apparent interictal  
18 events (Figure S6A) and identified four out of 11 mice to exhibit potential epileptiform activity (Figure S6B).  
19 None of the identified mice were raised on DOX.

20 To ensure that epileptiform activity would not bias our results, we removed flagged events and interpolated  
21 over the resulting gaps (in low-D) with Matlab's built-in autoregressive modeling (fillgaps.m) and a 20-frame  
22 prediction window. The result did not show any perturbations around the former interictal events (Figure  
23 S6C). When comparing modeling results between DOX- and non-DOX-raised mice, predicted variance was  
24 highly similar in all cases (Figure S6D-G). This shows that our results were not due to epileptiform activity  
25 and gave us confidence to include all mice in the dataset.

**Allen common coordinate framework v3**

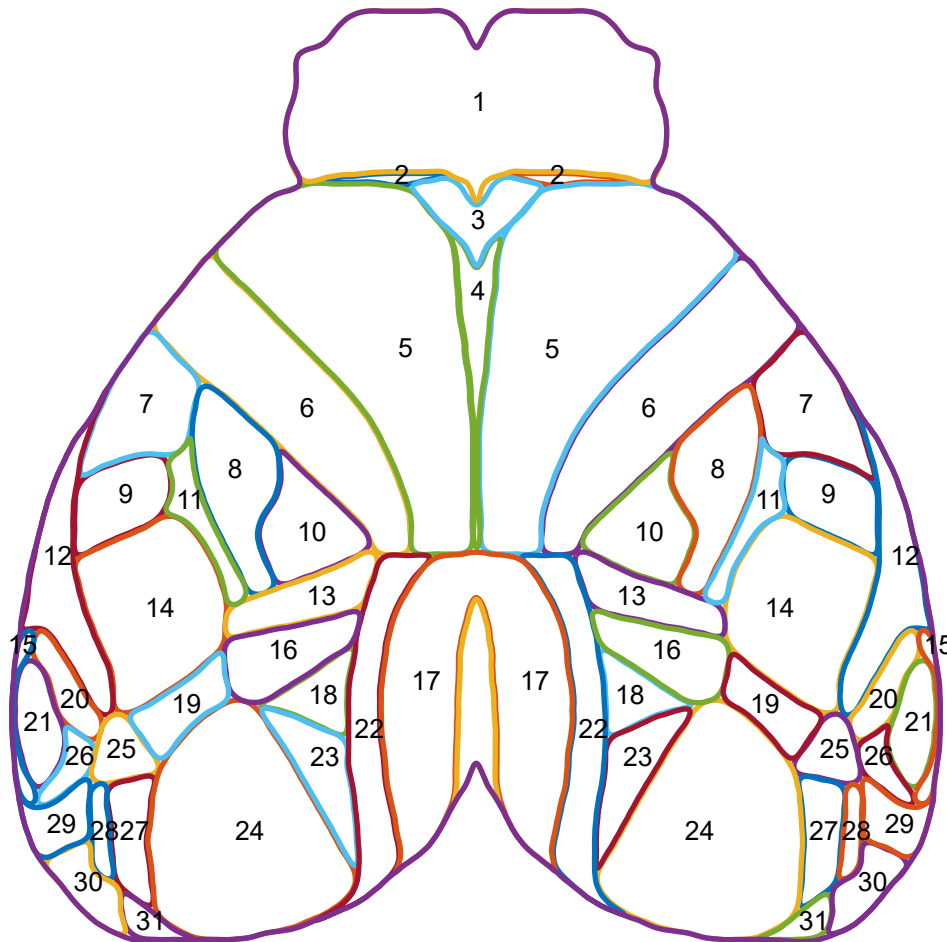

- 1 : Olfactory bulb (combined)
- 2 : Frontal pole, cerebral cortex
- 3 : Prelimbic area
- 4 : Anterior cingulate area, dorsal part
- 5 : Secondary motor area
- 6 : Primary motor area
- 7 : Primary somatosensory area, mouth
- 8 : Primary somatosensory area, upper limb
- 9 : Primary somatosensory area, nose
- 10 : Primary somatosensory area, lower limb
- 11 : Primary somatosensory area, unassigned
- 12 : Supplemental somatosensory area
- 13 : Primary somatosensory area, trunk
- 14 : Primary somatosensory area, barrel field
- 15 : Ventral auditory area
- 16 : Anterior visual area
- 17 : Retrosplenial area, dorsal part
- 18 : Anteromedial visual area
- 19 : Rostrolateral visual area
- 20 : Dorsal auditory area
- 21 : Primary auditory area
- 22 : Retrosplenial area, lateral agranular part
- 23 : Posteromedial visual area
- 24 : Primary visual area
- 25 : Anterolateral visual area
- 26 : Posterior auditory area
- 27 : Lateral visual area
- 28 : Laterointermediate area
- 29 : Temporal association areas
- 30 : Postrhinal area
- 31 : Posterolateral visual area

**Supplementary Figure S1. Overview over cortical areas.**

Shown are cortical areas based on the Allen common coordinate framework v.3.  
The labels of the corresponding cortical areas are shown on the right.

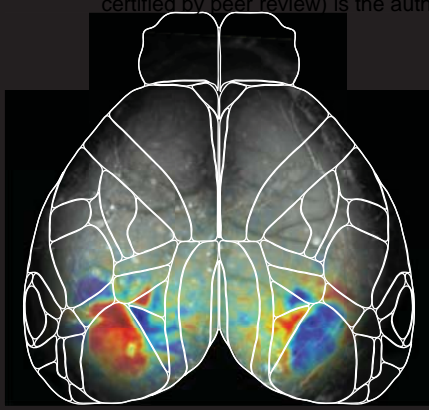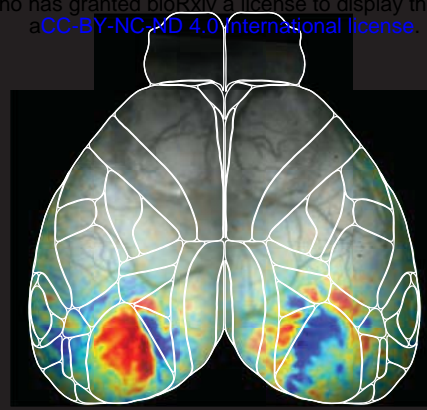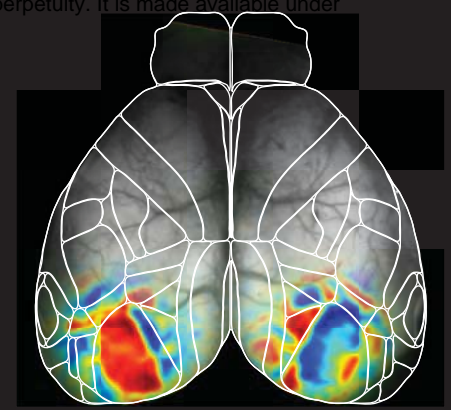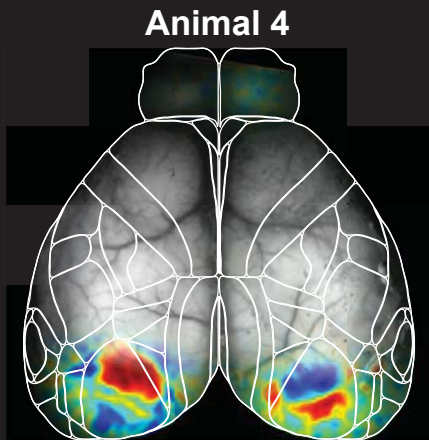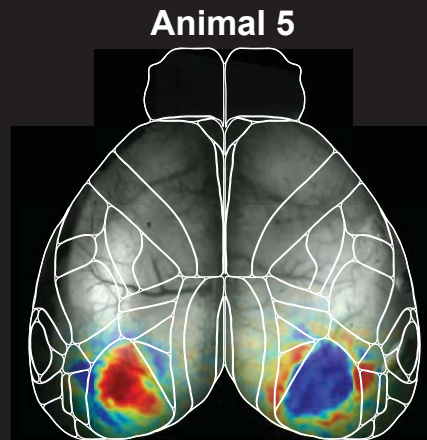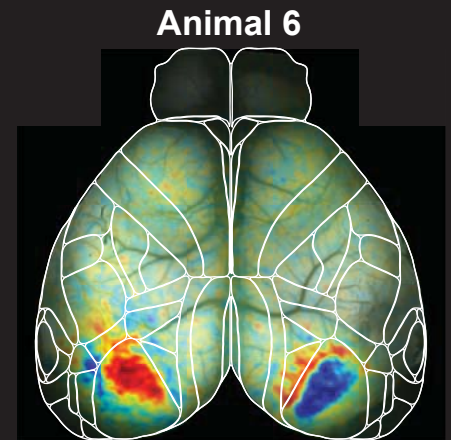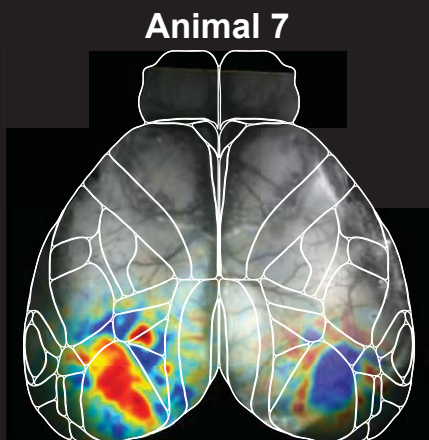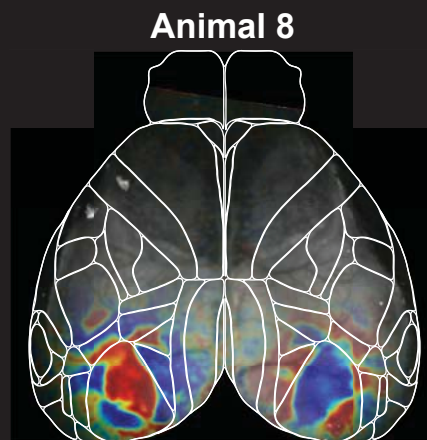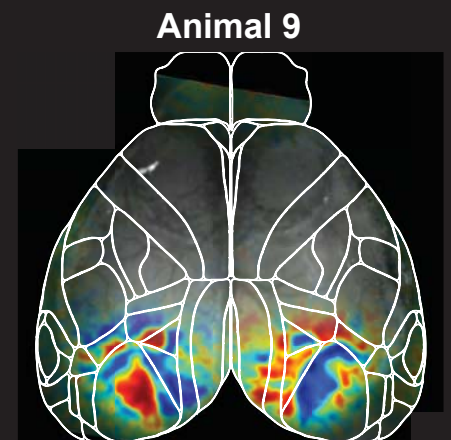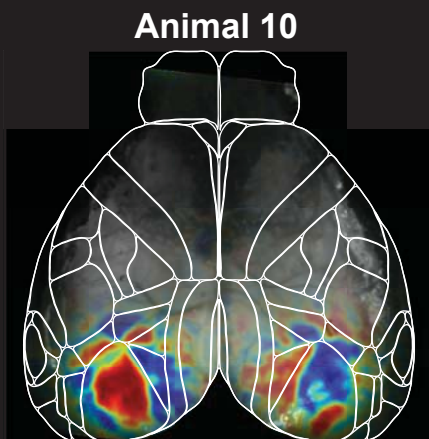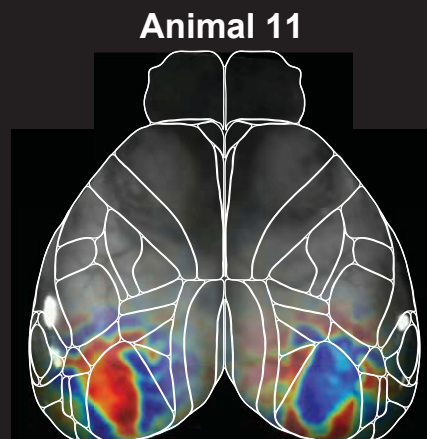

**Supplementary Figure S2. Visual sign maps for all mice.**

Shown are visual field sign maps for all trained animals, aligned to the Allen CCF. Mapped areas largely agreed with corresponding location of visual areas in the CCF.

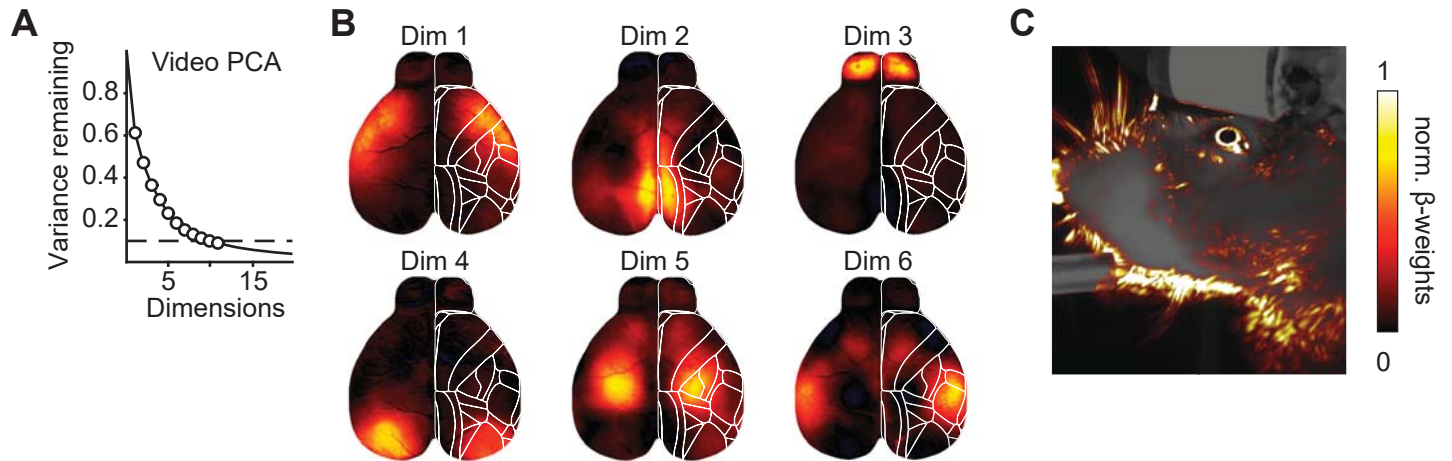

### Supplementary Figure S3. Relationship of widefield data to behavioral video

To understand the relation between widefield data and behavioral video, we analyzed the matrix of  $\beta$ -weights in the model corresponding to video regressors. **(A)** Variance remaining after including  $d$  PCA dimensions of this matrix (see methods). Dashed line shows 10% variance remaining (90% accounted for). **(B)** Widefield maps corresponding to the top video  $\beta$ -weight dimensions, after varimax sparsening. Six of eight dimensions shown. Overlaid white lines show Allen atlas borders. **(C)** Influence of each behavioral video pixel on widefield data. The opacity and color of the overlay were scaled between the 0th and 99th percentile over all values.

## Task variables

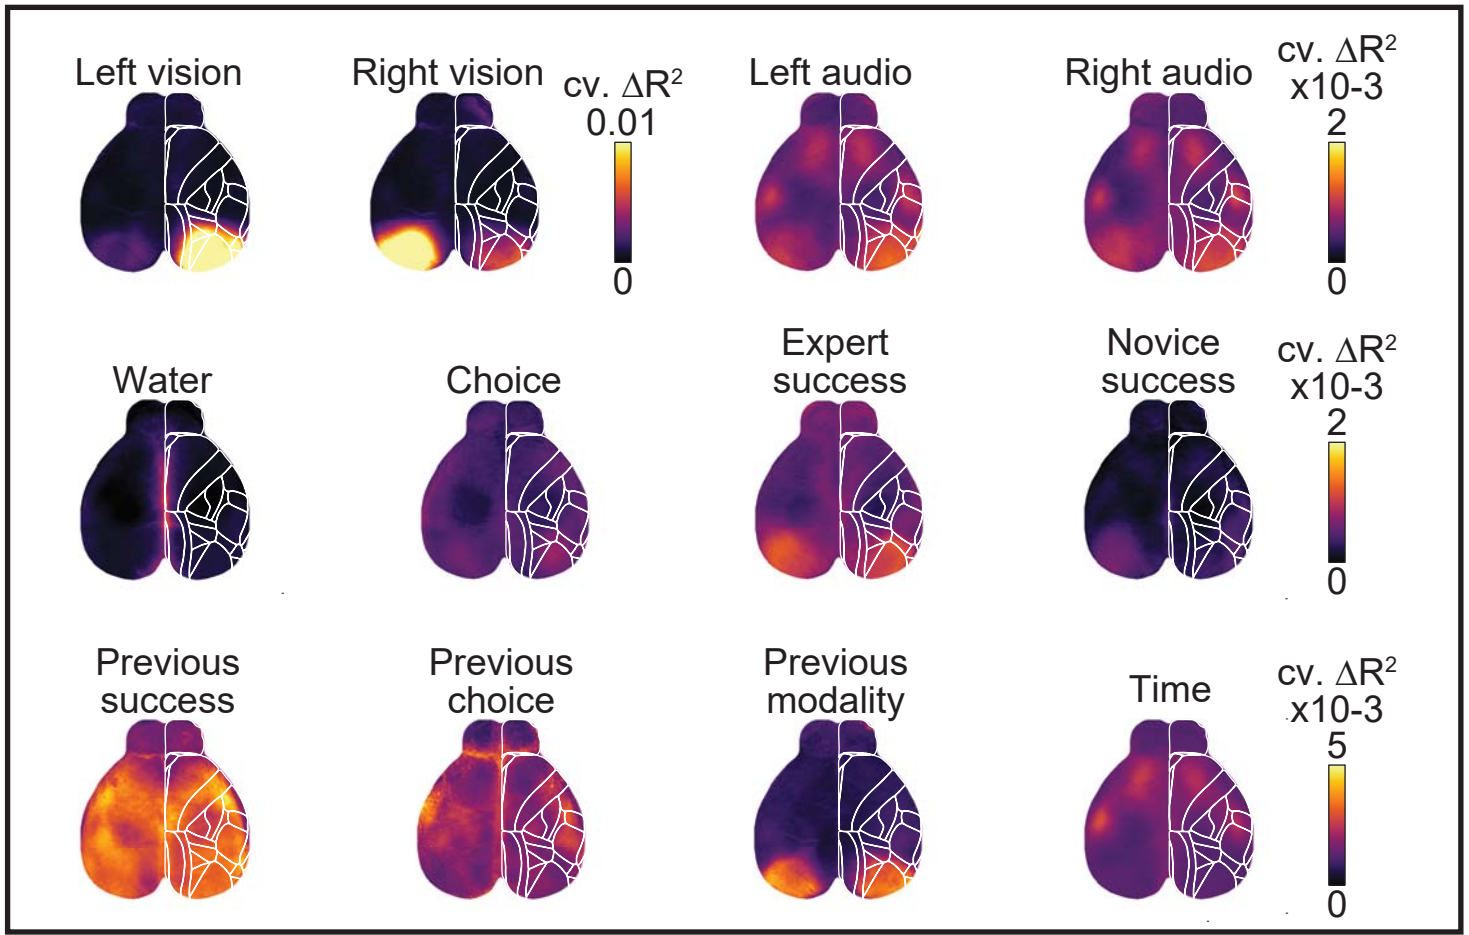

## Movement variables

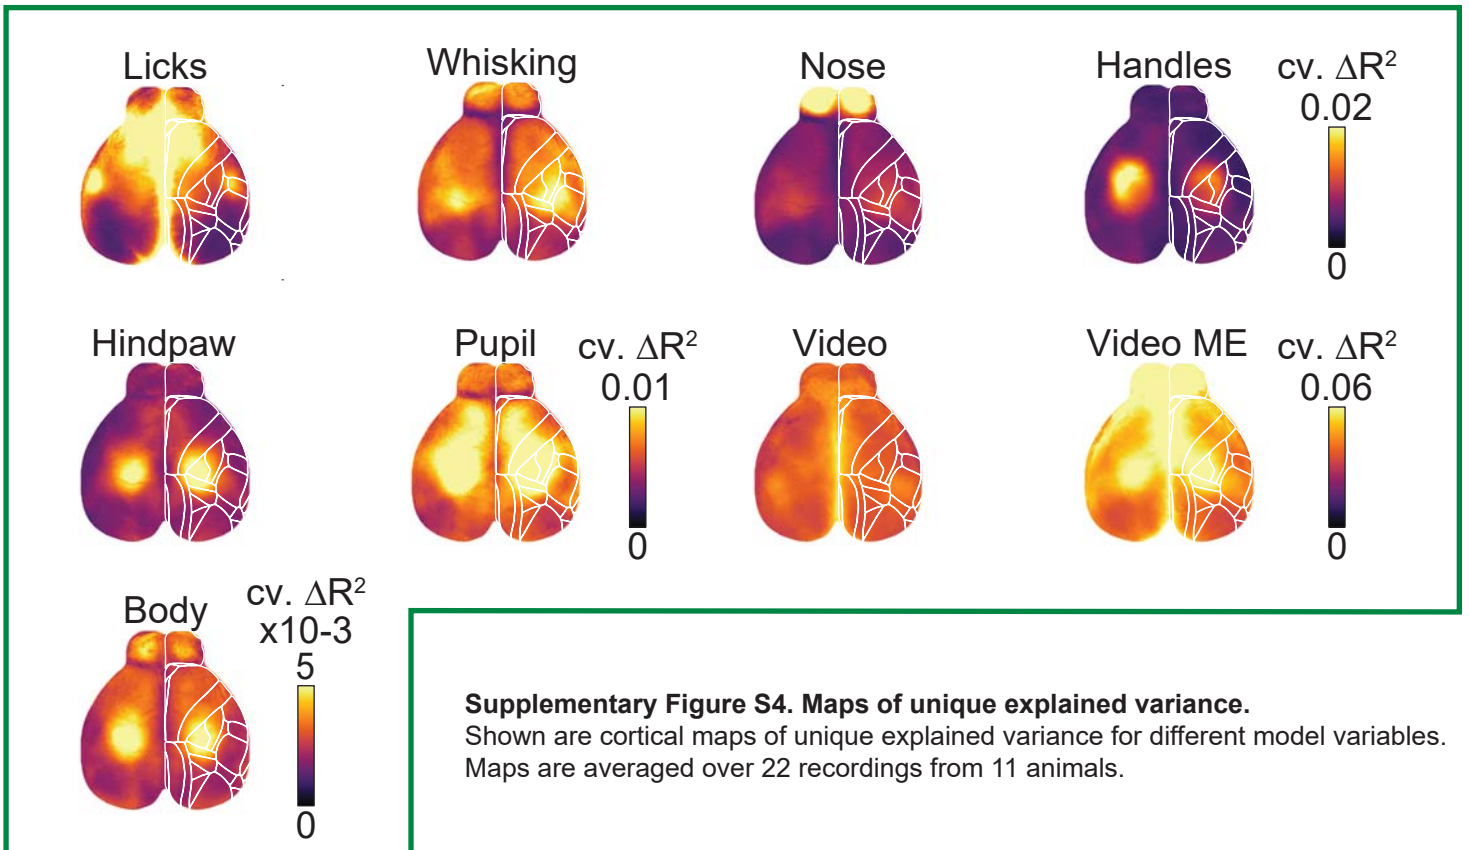

### Supplementary Figure S4. Maps of unique explained variance.

Shown are cortical maps of unique explained variance for different model variables. Maps are averaged over 22 recordings from 11 animals.

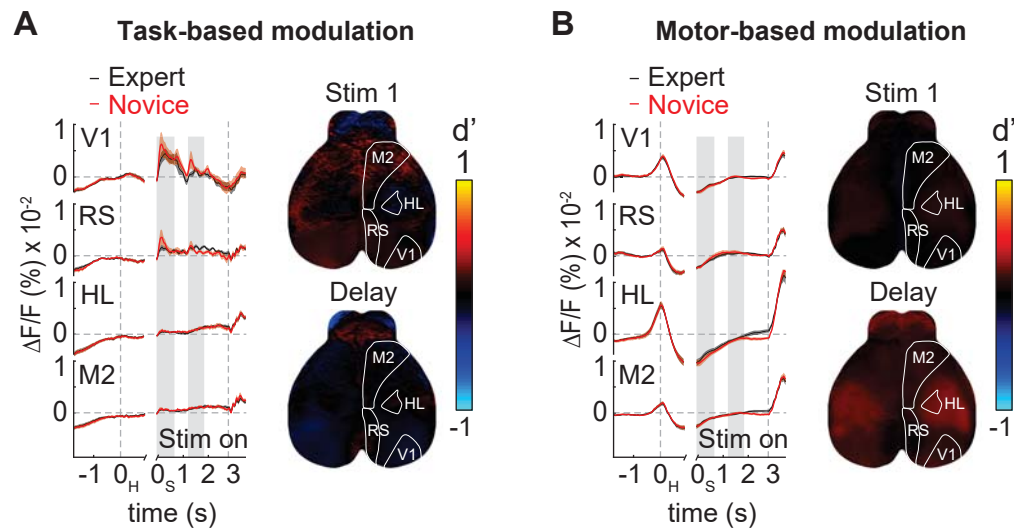

**Supplementary Figure S5. Difference between expert and novice decisions.**

**(A)** Reconstruction of widefield data, based on task variables without re-fitting as shown in Figure 3. Left: Traces show average responses in primary visual cortex (V1), retrosplenial cortex (RS), hindlimb somatosensory cortex (HL) and secondary motor cortex (M2) on the right hemisphere during the expert (black) or novice (red) modality. Trial averages are double-aligned to the time of trial initiation (left dashed line) and stimulus onset (gray bars). Right dashed line indicates response period, shading indicates s.e.m. Right:  $d'$  between expert versus novice modality during first visual stimulus (top) and the subsequent delay period (bottom). Isolating task-modulated activity did not result in a clear separation of expert and novice decisions. **(B)** Same as **(A)** but using reconstructed widefield data, based on movement variables.



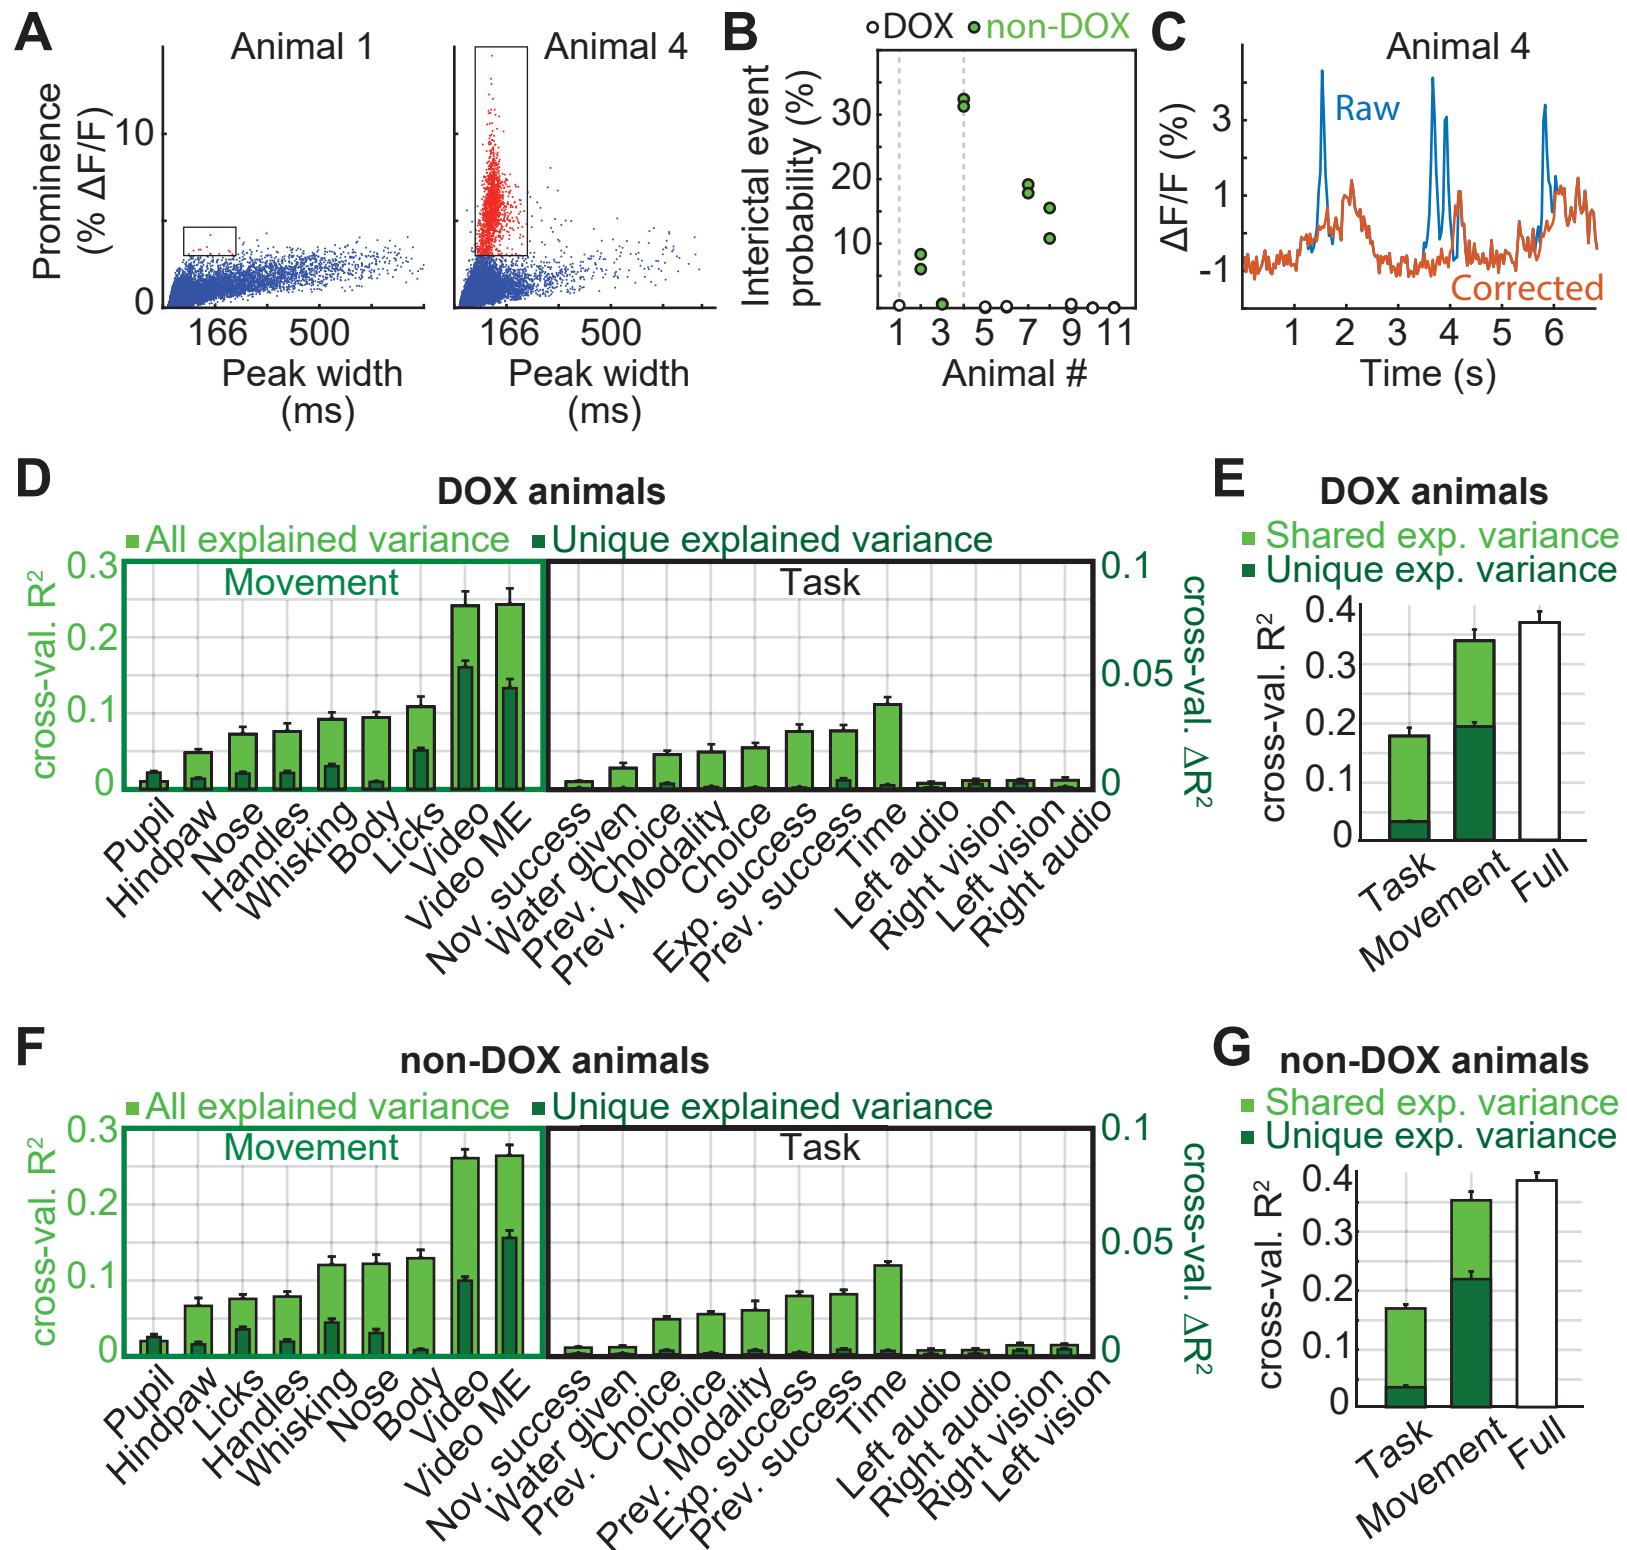

**Supplementary Figure S6. Controlling for potential interictal events.**

(A) Scatter plots show distribution of peaks in cortical activity, averaged over cortex. Left: Example animal, raised on a DOX-diet. Peaks were of variable length and remained at prominence below %5. Right: Example animal, raised on a standard-diet. Clearly visible are peaks of short latency and high prominence (red dots). (B) Interictal event probability for all mice. Four out of five mice that were raised on standard (non-DOX) diet show potential interictal activity. (C) Example trace for removal of interictal activity using interpolation. (D-E) Modeling results for all DOX-raised animals. Similar to Figure 2 E & G. (F-G) Modeling results for all non-DOX-raised animals, showing potential interictal activity. Modeling results between the two groups were highly similar, demonstrating that our results are not due to potential interictal activity in some of the mice.
